# Supplementary material for: Genome-wide chemical mutagenesis screens allow unbiased saturation of the cancer genome and identification of drug resistance mutations
Source: Genome Res. 2017 Apr;27(4):613–25. doi: 10.1101/gr.213546.116 (PMC5378179; doi:10.1101/gr.213546.116)
Supplement: Supplemental Material [file supp_gr.213546.116_Supplemental_Table_S1.xlsx]

## Sheet: Supp Table S1
Cancer	Genotype	Drug	Resistance Gene	Point mutations	Freq in resistant patients	References
Colorectal Cancer	KRAS/NRAS/BRAF wild-type	Cetuximab	EGFR	S492R, R451C, S464L, G465R, K467T, I491M, S492R	>90%	Montagut et al, PMID:22270724
			KRAS	G12x, G13x, Q61x		Bettegowda et al, PMID:24553385; Russo et al, PMID:26644315
			NRAS	G12x, Q61x		Siravegna et al, PMID:26030179
			BRAF	V600E		Arena et al, PMID:25623215
			MAP2K1 (MEK1)	K57x		Russo et al, PMID:26644315
Melanoma	BRAF V600E	BRAF Inhibitors	NRAS	Q61K	30-40%	Van Allen et al, PMID:24265153; Hugo et al, PMID:26359985
			MAP2K1 (MEK1)	Q56P, K57N,		Van Allen et al, PMID:24265153; Hugo et al, PMID:26359985
			MAP2K2 (MEK2)	C125S		Van Allen et al, PMID:24265153
			AKT1	p.Q79K		Hugo et al, PMID:26359985
			AKT3	p.E17K		Hugo et al, PMID:26359985
			NF1	R2450*		Van Allen et al, PMID:24265153
			RAC1	P29S		Van Allen et al, PMID:24265153
		BRAF & MEK Inhibitors	NRAS	G12D, Q61K	0.3	Long et al, PMID:25452114
			MAP2K1 (MEK1)	F53Y, V60E, P124x, G128x, V154I, G276W		Long et al, PMID:25452114; Wagle et al, PMID:24265154
			MAP2K2 (MEK2)	V35M, L46F, Q60K, C125S, N126D, E207K		Long et al, PMID:25452114
Lung Adenocarcinoma	EGFR L8585R or exon 19 deletion	Gefitinib & Erlotinib	EGFR	T790M	0.6	Yu et al, PMID:23470965
	T790M mutation	AZD9291	EGFR	C797S	40% (6/15 cases)	Thress et al, PMID:25939061
Lung Adenocarcinoma	EML4-ALK gene fusion	Crizotinib	ALK	C1156Y, L1196M, G1202R, S1206Y	0.25	Katayama et al, PMID:22277784
Chronic Myeloid Leukemia	BCR-ABL	Imatinib	ABL1	> 60 different point mutations	0.3	Marce et al, PMID:23433665
