# Supplementary material for: Genome-wide chemical mutagenesis screens allow unbiased saturation of the cancer genome and identification of drug resistance mutations
Source: Genome Res. 2017 Apr;27(4):613–25. doi: 10.1101/gr.213546.116 (PMC5378179; doi:10.1101/gr.213546.116)
Supplement: Supplemental Material [file supp_gr.213546.116_Supplemental_Table_S2.xlsx]

## Sheet: Supp Table S2
Cetuximab Resistant Clone	Exome Sequence X	MSI status	Total Mutations	Complex	Indels	Substitutions	Missense	Nonsense	Frameshift	Inframe	Intronic	Silent	Other	New Defect in DDR pathway
CCK-81-ENU-ContemporaryParental	157.847	MSI	NA	NA	NA	NA	NA	NA	NA	NA	NA	NA	NA
CCK-81_ENU_Pilot_10	60.7266	MSI	778	1	45	732	228	7	38	2	308	93	102
CCK-81_ENU_Pilot_12	76.0368	MSI	466	0	36	430	157	8	27	5	147	49	73
CCK-81_ENU_Pilot_15	76.0727	MSI	868	1	42	825	286	17	35	5	310	101	114
CCK-81_ENU_Pilot_18	65.8922	MSI	564	0	28	536	178	10	20	3	211	65	77
CCK-81_ENU_Pilot_2	64.1022	MSI	599	2	32	565	220	9	27	4	187	63	89
CCK-81_ENU_Pilot_26	61.2507	MSI	506	1	31	474	157	7	26	2	180	60	74
CCK-81_ENU_Pilot_27	67.46	MSI	269	1	29	239	76	2	27	1	99	30	34
CCK-81_ENU_Pilot_28	71.6366	MSI	308	1	28	279	96	2	22	4	113	31	40
CCK-81_ENU_Pilot_29	66.5352	MSI	263	1	39	223	72	4	29	2	83	35	38
CCK-81_ENU_Pilot_3	57.4497	MSI	824	1	54	769	244	14	44	4	311	104	103
CCK-81_ENU_Pilot_4	62.9537	MSI	545	1	30	514	184	3	26	1	195	45	91
CCK-81_ENU_Pilot_5	57.5006	MSI	470	3	24	443	150	8	21	2	163	62	64
CCK-81_ENU_Pilot_7	67.9787	MSI	840	1	29	810	286	12	25	1	324	87	105
CCK-81_ENU_Pilot_9	66.7445	MSI	687	1	33	653	237	11	31	1	241	73	93
NCI-H508-ENU-ContemporaryParental	144.211	MSS	NA	NA	NA	NA	NA	NA	NA	NA	NA	NA	NA
NCI-H508_ENU_Flat_1	74.6575	MSS	195	0	3	192	76	3	1	2	72	20	21
NCI-H508_ENU_Flat_10	68.1674	MSS	508	0	2	506	175	10	0	0	188	66	69
NCI-H508_ENU_Flat_11	65.7321	MSS	251	1	5	245	89	9	4	2	91	37	19
NCI-H508_ENU_Flat_13	62.0634	MSS	183	0	4	179	58	1	2	2	80	18	22
NCI-H508_ENU_Flat_15	63.9229	MSS	146	1	3	142	48	2	1	1	59	18	17
NCI-H508_ENU_Flat_19	63.8678	MSS	110	0	3	107	40	1	2	1	41	12	13
NCI-H508_ENU_Flat_20	66.8977	MSS	197	1	1	195	65	8	1	0	73	26	24
NCI-H508_ENU_Flat_21	65.802	MSS	145	3	4	138	45	1	2	3	61	12	21
NCI-H508_ENU_Flat_25	64.542	MSS	361	0	7	354	117	3	4	1	133	58	45
NCI-H508_ENU_Flat_27	60.3402	MSS	114	0	4	110	38	3	1	3	35	16	18
NCI-H508_ENU_Flat_3	68.3818	MSS	173	1	3	169	57	2	2	1	66	21	24
NCI-H508_ENU_Flat_5	66.7762	MSS	216	0	2	214	73	6	1	1	73	32	30
NCI-H508_ENU_Flat_6	64.0045	MSS	182	0	2	180	75	4	1	1	63	19	19
NCI-H508_ENU_Flat_7	64.355	MSS	251	0	4	247	80	7	1	1	89	37	36
NCI-H508_ENU_Flat_8	63.247	MSS	167	0	4	163	55	2	2	2	57	28	21
NCI-H508_ENU_Flat_9	61.5571	MSS	248	1	2	245	84	10	0	1	83	31	39
NCI-H508-ENU-Cetuximab-1	58.9186	MSS	189	0	0	189	72	2	0	0	65	18	32
NCI-H508-ENU-Cetuximab-10	64.7339	MSS	229	0	2	227	79	4	1	0	93	21	31
NCI-H508-ENU-Cetuximab-11	49.7312	MSS	114	0	0	114	34	3	0	0	48	17	12
NCI-H508-ENU-Cetuximab-12	54.008	MSS	251	0	0	251	81	7	0	0	116	20	27
NCI-H508-ENU-Cetuximab-13	69.2299	MSS	210	0	0	210	62	6	0	0	84	26	32
NCI-H508-ENU-Cetuximab-14	52.7772	MSS	224	0	1	223	79	4	1	0	88	20	32
NCI-H508-ENU-Cetuximab-15	69.5691	MSS	208	0	4	204	80	8	1	3	65	22	29
NCI-H508-ENU-Cetuximab-16	65.7053	MSS	158	0	1	157	50	0	1	0	67	15	25
NCI-H508-ENU-Cetuximab-17	56.8917	MSS	207	0	0	207	63	4	0	0	84	24	32
NCI-H508-ENU-Cetuximab-18	57.925	MSS	78	0	2	76	20	7	0	0	28	12	11
NCI-H508-ENU-Cetuximab-19	67.8948	MSS	285	0	1	284	79	8	0	1	109	39	49
NCI-H508-ENU-Cetuximab-2	61.604	MSS	191	0	2	189	54	4	0	2	90	14	27
NCI-H508-ENU-Cetuximab-20	45.9829	MSS	142	0	2	140	42	4	2	0	61	17	16
NCI-H508-ENU-Cetuximab-21	65.7447	MSS	230	0	1	229	77	2	0	1	95	24	31
NCI-H508-ENU-Cetuximab-22	56.1915	MSS	2570	0	34	2536	609	36	16	12	1127	372	398	POLQ p.S1819*
NCI-H508-ENU-Cetuximab-23	55.9243	MSS	187	0	3	184	55	1	2	0	75	29	25
NCI-H508-ENU-Cetuximab-24	69.4144	MSS	195	0	1	194	65	9	1	0	64	21	35
NCI-H508-ENU-Cetuximab-25	70.9045	MSS	184	0	4	180	61	5	3	0	68	21	26
NCI-H508-ENU-Cetuximab-26	70.7508	MSI	9198	2	565	8631	2729	168	476	33	3062	1460	1270	MLH1 p.R226*
NCI-H508-ENU-Cetuximab-27	59.7674	MSS	114	0	4	110	40	2	2	0	42	12	16
NCI-H508-ENU-Cetuximab-28	57.7191	MSS	235	0	2	233	83	11	1	0	73	30	37
NCI-H508-ENU-Cetuximab-29	75.5135	MSS	160	1	3	156	45	1	2	2	67	15	28
NCI-H508-ENU-Cetuximab-3	65.7894	MSS	200	0	0	200	72	3	0	0	72	18	35
NCI-H508-ENU-Cetuximab-30	63.4621	MSS	2614	1	27	2586	621	37	15	10	1151	375	405	POLQ p.S1819*
NCI-H508-ENU-Cetuximab-31	60.9135	MSS	172	0	2	170	42	2	0	0	79	19	30
NCI-H508-ENU-Cetuximab-32	57.4346	MSS	168	0	3	165	45	3	1	1	82	13	23
NCI-H508-ENU-Cetuximab-33	64.5239	MSS	555	0	0	555	199	11	0	0	205	63	77
NCI-H508-ENU-Cetuximab-34	56.9615	MSS	173	0	1	172	57	8	1	0	50	30	27
NCI-H508-ENU-Cetuximab-35	73.5392	MSS	138	1	2	135	58	4	0	1	43	13	19
NCI-H508-ENU-Cetuximab-36	49.9442	MSS	130	0	0	130	42	5	0	0	43	20	20
NCI-H508-ENU-Cetuximab-37	58.9181	MSS	195	0	1	194	60	8	0	0	82	18	27
NCI-H508-ENU-Cetuximab-38	63.3529	MSS	205	0	1	204	67	4	0	1	84	19	30
NCI-H508-ENU-Cetuximab-39	54.1856	MSS	140	0	1	139	53	4	0	1	48	18	16
NCI-H508-ENU-Cetuximab-4	59.4424	MSS	182	0	0	182	74	4	0	0	72	16	16
NCI-H508-ENU-Cetuximab-40	52.6066	MSI	824	0	57	767	258	11	49	5	235	142	124	EXO1 p.D731fs*4
NCI-H508-ENU-Cetuximab-41	57.9963	MSS	112	0	0	112	46	1	0	0	33	15	17
NCI-H508-ENU-Cetuximab-42	49.5407	MSS	196	0	0	196	61	7	0	0	71	22	35
NCI-H508-ENU-Cetuximab-5	63.9297	MSS	166	0	1	165	47	3	1	0	73	20	22
NCI-H508-ENU-Cetuximab-6	62.0606	MSS	220	0	2	218	77	3	1	0	80	28	31
NCI-H508-ENU-Cetuximab-7	54.9234	MSS	196	0	1	195	70	3	1	0	81	14	27
NCI-H508-ENU-Cetuximab-8	66.9759	MSS	155	0	0	155	45	0	0	0	62	20	28
NCI-H508-ENU-Cetuximab-9	55.0176	MSS	123	0	1	122	42	4	0	1	40	17	19
