# Supplementary material for: Genome-wide chemical mutagenesis screens allow unbiased saturation of the cancer genome and identification of drug resistance mutations
Source: Genome Res. 2017 Apr;27(4):613–25. doi: 10.1101/gr.213546.116 (PMC5378179; doi:10.1101/gr.213546.116)
Supplement: Supplemental Material [file supp_gr.213546.116_Supplemental_Table_S3.xlsx]

## Sheet: Supp Table S3
Pathway	Pathway internal numerical identifier	Number of genes in the pathway	Pathway total exonic block length (bases)	(E)xpected number of samples with mutations in the pathway	(O)bserved number of samples with mutations in the pathway	Observed vs. Expected number of samples with mutations in the pathway log10 (oddRatio= (O/E))	P-Value	% FDR	Exclusive Coverage	Mutated Genes (% of mutated samples)	Probability of observing at least one mutation in the pathway under consideration, across all the samples
											prob CCK.81_ENU_Pilot_10	prob CCK.81_ENU_Pilot_12	prob CCK.81_ENU_Pilot_15	prob CCK.81_ENU_Pilot_18	prob CCK.81_ENU_Pilot_2	prob CCK.81_ENU_Pilot_26	prob CCK.81_ENU_Pilot_27	prob CCK.81_ENU_Pilot_28	prob CCK.81_ENU_Pilot_29	prob CCK.81_ENU_Pilot_3	prob CCK.81_ENU_Pilot_4	prob CCK.81_ENU_Pilot_5	prob CCK.81_ENU_Pilot_7	prob CCK.81_ENU_Pilot_9	prob NCI.H508_ENU_Flat_1	prob NCI.H508_ENU_Flat_10	prob NCI.H508_ENU_Flat_11	prob NCI.H508_ENU_Flat_13	prob NCI.H508_ENU_Flat_15	prob NCI.H508_ENU_Flat_19	prob NCI.H508_ENU_Flat_20	prob NCI.H508_ENU_Flat_21	prob NCI.H508_ENU_Flat_25	prob NCI.H508_ENU_Flat_27	prob NCI.H508_ENU_Flat_3	prob NCI.H508_ENU_Flat_5	prob NCI.H508_ENU_Flat_6	prob NCI.H508_ENU_Flat_7	prob NCI.H508_ENU_Flat_8	prob NCI.H508_ENU_Flat_9	prob NCI.H508.ENU.Cetuximab.1	prob NCI.H508.ENU.Cetuximab.10	prob NCI.H508.ENU.Cetuximab.11	prob NCI.H508.ENU.Cetuximab.12	prob NCI.H508.ENU.Cetuximab.13	prob NCI.H508.ENU.Cetuximab.14	prob NCI.H508.ENU.Cetuximab.15	prob NCI.H508.ENU.Cetuximab.16	prob NCI.H508.ENU.Cetuximab.17
Signalling To P38 Via RIT And RIN	1085	22	122158	12.5771	45	0.553631	2.70336e-16	1.58957e-11	86.6667	BRAF (18.1 %) NRAS (15.3 %) KRAS (12.5 %) MAP2K1 ( 5.6 %) IL6R ( 2.8 %) JAK1 ( 2.8 %) NGF ( 2.8 %) RAF1 ( 2.8 %) HRAS ( 1.4 %) IL6ST ( 1.4 %) MAP2K2 ( 1.4 %) MAPK3 ( 1.4 %)	0.324027	0.243262	0.402336	0.271203	0.33207	0.236764	0.12037	0.144111	0.118865	0.358928	0.286006	0.236764	0.380483	0.329782	0.123373	0.284784	0.147033	0.100596	0.0835178	0.0693036	0.115846	0.0772274	0.203427	0.0661151	0.0928732	0.157183	0.133804	0.136762	0.100596	0.16006	0.115846	0.126366	0.0532514	0.136762	0.115846	0.138237	0.139709	0.0819493	0.114333
Prolonged ERK Activation Events	894	27	166735	16.1879	46	0.453566	6.04404e-16	1.93145e-11	78.2609	BRAF (18.1 %) NRAS (15.3 %) KRAS (12.5 %) MAP2K1 ( 5.6 %) KIDINS220 ( 4.2 %) IL6R ( 2.8 %) JAK1 ( 2.8 %) NGF ( 2.8 %) RAF1 ( 2.8 %) CRKL ( 1.4 %) HRAS ( 1.4 %) IL6ST ( 1.4 %) MAP2K2 ( 1.4 %) MAPK3 ( 1.4 %) PLCG1 ( 1.4 %)	0.418722	0.320341	0.509878	0.354858	0.428282	0.312243	0.162792	0.193933	0.160806	0.459882	0.372941	0.312243	0.484877	0.425567	0.16675	0.371453	0.197744	0.136606	0.113811	0.0947123	0.156821	0.105373	0.270278	0.0904127	0.126318	0.210938	0.180454	0.184328	0.136606	0.214668	0.156821	0.170689	0.073009	0.184328	0.156821	0.186258	0.188184	0.111709	0.154821
Ras Signaling In The CD4+ TCR Pathway	938	14	87928	11.5098	40	0.540993	6.56957e-16	1.93145e-11	87.5	BRAF (18.1 %) NRAS (15.3 %) KRAS (12.5 %) MAP2K1 ( 5.6 %) RAF1 ( 2.8 %) HRAS ( 1.4 %) MAPK3 ( 1.4 %) PRKCA ( 1.4 %) PRKCB ( 1.4 %)	0.295418	0.220602	0.368869	0.246384	0.302919	0.214621	0.108347	0.129896	0.106983	0.328036	0.260086	0.214621	0.348275	0.300784	0.11107	0.258954	0.132553	0.0904458	0.0750182	0.0622012	0.104247	0.0693435	0.184018	0.0593289	0.0834654	0.141788	0.120533	0.123219	0.0904458	0.144409	0.104247	0.113784	0.0477516	0.123219	0.104247	0.124558	0.125896	0.0736028	0.102877
Activation Of RAS In B Cells	72	5	30820	3.23605	21	0.812205	1.30718e-13	3.0745e-09	100	NRAS (15.3 %) KRAS (12.5 %) HRAS ( 1.4 %)	0.0757817	0.0545498	0.0984004	0.0616807	0.0780054	0.0529216	0.0254799	0.030831	0.0251445	0.085589	0.0655477	0.0529216	0.091861	0.0773706	0.0261504	0.065226	0.0314979	0.0211104	0.0173978	0.0143497	0.0244733	0.0160443	0.0447383	0.0136711	0.0194246	0.0338281	0.0284935	0.029162	0.0211104	0.0344929	0.0244733	0.0268205	0.0109519	0.029162	0.0244733	0.029496	0.0298299	0.0170596	0.0241375
Downstream Signaling In NaÃ¯ve CD8+ T Cells	363	65	289788	16.9034	44	0.415478	1.75736e-13	3.44444e-09	81.8182	BRAF (18.1 %) NRAS (15.3 %) KRAS (12.5 %) MAP2K1 ( 5.6 %) NFATC2 ( 4.2 %) IL2RG ( 2.8 %) NFATC1 ( 2.8 %) RAF1 ( 2.8 %) CD3G ( 1.4 %) HRAS ( 1.4 %) IFNA6 ( 1.4 %) IL2RB ( 1.4 %) MAP2K2 ( 1.4 %) MAPK3 ( 1.4 %) PRKCA ( 1.4 %) PRKCB ( 1.4 %) PRKCQ ( 1.4 %)	0.436994	0.335619	0.530029	0.371292	0.446794	0.327233	0.171504	0.204099	0.169423	0.479118	0.389936	0.327233	0.504607	0.444012	0.175651	0.388403	0.208083	0.14404	0.120092	0.1	0.165246	0.111218	0.283689	0.0954732	0.133237	0.221867	0.19	0.194054	0.14404	0.225762	0.165246	0.179776	0.0771372	0.194054	0.165246	0.196073	0.198087	0.117882	0.163149
GMCSF-mediated Signaling Events	489	37	214158	17.3039	44	0.40531	4.62011e-13	7.76178e-09	86.3636	NRAS (15.3 %) KRAS (12.5 %) GAB2 ( 5.6 %) MAP2K1 ( 5.6 %) PIK3CA ( 5.6 %) INPP5D ( 4.2 %) PRKACG ( 2.8 %) RAF1 ( 2.8 %) STAT1 ( 2.8 %) STAT3 ( 2.8 %) CSF2 ( 1.4 %) HRAS ( 1.4 %) MAP2K2 ( 1.4 %) MAPK3 ( 1.4 %) PIK3R1 ( 1.4 %) SHC1 ( 1.4 %) STAT5A ( 1.4 %) SYK ( 1.4 %)	0.447139	0.344162	0.541128	0.380459	0.457064	0.33562	0.176423	0.209829	0.174289	0.489761	0.399404	0.33562	0.515499	0.454247	0.180675	0.397848	0.213909	0.148244	0.123648	0.102996	0.170004	0.114529	0.291214	0.0983414	0.137151	0.228021	0.195384	0.199538	0.148244	0.232007	0.170004	0.184905	0.079479	0.199538	0.170004	0.201607	0.203671	0.121377	0.167854
Signalling To ERKs	1083	45	263980	19.3057	46	0.377073	1.12774e-12	1.65777e-08	71.7391	BRAF (18.1 %) NRAS (15.3 %) KRAS (12.5 %) MAP2K1 ( 5.6 %) KIDINS220 ( 4.2 %) IL6R ( 2.8 %) JAK1 ( 2.8 %) NGF ( 2.8 %) RAF1 ( 2.8 %) CRKL ( 1.4 %) HRAS ( 1.4 %) IL6ST ( 1.4 %) MAP2K2 ( 1.4 %) MAPK3 ( 1.4 %) MAPKAPK2 ( 1.4 %) PLCG1 ( 1.4 %) SHC1 ( 1.4 %) SHC3 ( 1.4 %) SRC ( 1.4 %)	0.496895	0.386741	0.594625	0.425907	0.507349	0.377474	0.201472	0.238894	0.199073	0.541571	0.446206	0.377474	0.568266	0.504385	0.206249	0.444542	0.243447	0.169716	0.141862	0.118378	0.194254	0.131503	0.328992	0.113073	0.157169	0.259167	0.222743	0.227392	0.169716	0.263599	0.194254	0.210997	0.0915304	0.227392	0.194254	0.229706	0.232013	0.139284	0.191833
MEK Activation	682	7	38380	6.55161	27	0.615015	1.65414e-12	2.1614e-08	92.5926	NRAS (15.3 %) KRAS (12.5 %) MAP2K1 ( 5.6 %) RAF1 ( 2.8 %) HRAS ( 1.4 %) MAP2K2 ( 1.4 %)	0.161687	0.117975	0.206907	0.132793	0.166195	0.114572	0.0561247	0.0676841	0.0553975	0.181465	0.140771	0.114572	0.193976	0.164909	0.0575774	0.140109	0.0691191	0.0466272	0.0385163	0.0318287	0.0539414	0.0355498	0.0973586	0.0303363	0.0429489	0.074124	0.0626444	0.0640871	0.0466272	0.075549	0.0539414	0.0590279	0.0243436	0.0640871	0.0539414	0.0648076	0.0655276	0.0377755	0.0532125
RAF Activation	915	5	29385	4.84968	22	0.65671	5.61555e-11	6.57554e-07	95.4545	NRAS (15.3 %) KRAS (12.5 %) RAF1 ( 2.8 %) HRAS ( 1.4 %)	0.11685	0.0846489	0.150689	0.0955112	0.120199	0.0821621	0.0398798	0.0481794	0.0393586	0.131582	0.101382	0.0821621	0.140955	0.119243	0.0409212	0.100894	0.0492118	0.033083	0.0272944	0.0225324	0.0383155	0.0251808	0.0696263	0.0214711	0.0304561	0.0528164	0.0445572	0.0455935	0.033083	0.0538438	0.0383155	0.0419614	0.0172141	0.0455935	0.0383155	0.0461112	0.0466287	0.0267664	0.0377936
Trk Receptor Signaling Mediated By The MAPK Pathway	1210	34	221130	17.8962	42	0.370489	6.15059e-11	6.57554e-07	80.9524	BRAF (18.1 %) NRAS (15.3 %) KRAS (12.5 %) MAP2K1 ( 5.6 %) RUSC1 ( 5.6 %) MEF2C ( 2.8 %) RAF1 ( 2.8 %) RPS6KA5 ( 2.8 %) CDK5 ( 1.4 %) HRAS ( 1.4 %) MAP3K2 ( 1.4 %) MAPK3 ( 1.4 %) MAPKAPK2 ( 1.4 %) TRPV1 ( 1.4 %)	0.462031	0.356786	0.557305	0.393976	0.47213	0.34802	0.183756	0.218357	0.181543	0.505337	0.413348	0.34802	0.531408	0.469264	0.188163	0.411757	0.222578	0.154517	0.128961	0.107477	0.1771	0.119477	0.302366	0.102632	0.142995	0.237172	0.203403	0.207705	0.154517	0.241291	0.1771	0.192547	0.0829847	0.207705	0.1771	0.209847	0.211983	0.1266	0.174869
P38MAPK Events	1467	14	73125	5.39728	22	0.610248	5.14294e-10	5.04008e-06	95.4545	NRAS (15.3 %) KRAS (12.5 %) HRAS ( 1.4 %) MAPKAPK2 ( 1.4 %) SRC ( 1.4 %)	0.131139	0.0952151	0.168704	0.107352	0.134865	0.0924339	0.0449953	0.0543291	0.0444089	0.147517	0.113903	0.0924339	0.157919	0.133802	0.046167	0.113359	0.0554894	0.0373438	0.0308215	0.0254523	0.043235	0.0284389	0.0783986	0.0242551	0.0343846	0.0595392	0.0502568	0.0514221	0.0373438	0.0606931	0.043235	0.0473373	0.0194516	0.0514221	0.043235	0.0520042	0.052586	0.0302264	0.0426475
IL2-mediated Signaling Events	580	54	316733	23.6214	47	0.298792	9.90979e-10	8.96454e-06	70.2128	IRS2 (18.1 %) NRAS (15.3 %) KRAS (12.5 %) GAB2 ( 5.6 %) MAP2K1 ( 5.6 %) PIK3CA ( 5.6 %) RASA1 ( 4.2 %) IL2RG ( 2.8 %) JAK1 ( 2.8 %) JAK3 ( 2.8 %) RAF1 ( 2.8 %) STAT1 ( 2.8 %) STAT3 ( 2.8 %) HRAS ( 1.4 %) IL2RB ( 1.4 %) IRS1 ( 1.4 %) MAP2K2 ( 1.4 %) MAPK3 ( 1.4 %) MAPKAPK2 ( 1.4 %) PIK3R1 ( 1.4 %) PRKCB ( 1.4 %) PTK2B ( 1.4 %) SHC1 ( 1.4 %) STAT5A ( 1.4 %) SYK ( 1.4 %)	0.597975	0.47723	0.698126	0.521048	0.609019	0.466724	0.258026	0.303794	0.255068	0.644631	0.543381	0.466724	0.671816	0.605895	0.263908	0.541561	0.309312	0.218634	0.183673	0.153908	0.249116	0.170576	0.410945	0.147148	0.202932	0.328286	0.284128	0.289803	0.218634	0.33361	0.249116	0.269743	0.119561	0.289803	0.249116	0.292623	0.295433	0.180418	0.246122
Signaling By Leptin	1055	26	164804	16.9324	39	0.362346	1.15958e-09	9.7405e-06	71.7949	IRS2 (18.1 %) NRAS (15.3 %) KRAS (12.5 %) MAP2K1 ( 5.6 %) IL6R ( 2.8 %) JAK1 ( 2.8 %) RAF1 ( 2.8 %) STAT3 ( 2.8 %) HRAS ( 1.4 %) IL6ST ( 1.4 %) IRS1 ( 1.4 %) LEP ( 1.4 %) MAP2K2 ( 1.4 %) MAPK3 ( 1.4 %) SH2B1 ( 1.4 %) STAT5A ( 1.4 %)	0.437731	0.336237	0.530837	0.371956	0.44754	0.32784	0.17186	0.204513	0.169775	0.479892	0.390622	0.32784	0.505399	0.444755	0.176013	0.389088	0.208504	0.144344	0.120348	0.100216	0.165589	0.111457	0.284234	0.09568	0.133519	0.222312	0.190389	0.19445	0.144344	0.226213	0.165589	0.180147	0.077306	0.19445	0.165589	0.196473	0.19849	0.118134	0.163489
Signaling By Constitutively Active EGFR	1068	19	123434	12.2647	32	0.416493	3.86811e-09	3.0326e-05	87.5	NRAS (15.3 %) KRAS (12.5 %) EGFR ( 6.9 %) PIK3CA ( 5.6 %) HRAS ( 1.4 %) PIK3R1 ( 1.4 %) PLCG1 ( 1.4 %) RPS27A ( 1.4 %) SHC1 ( 1.4 %) UBB ( 1.4 %)	0.315675	0.236619	0.39261	0.263937	0.323564	0.23027	0.116825	0.139924	0.115361	0.349927	0.278423	0.23027	0.371111	0.321319	0.119746	0.277227	0.142769	0.097601	0.081008	0.0672051	0.112425	0.0748988	0.197726	0.0641098	0.0900962	0.152651	0.129894	0.132771	0.097601	0.155454	0.112425	0.122657	0.0516254	0.132771	0.112425	0.134207	0.13564	0.0794844	0.110954
EGFR Transactivation By Gastrin	375	9	56763	7.84016	25	0.503615	5.97967e-09	4.39506e-05	88	NRAS (15.3 %) KRAS (12.5 %) EGFR ( 6.9 %) HRAS ( 1.4 %) PRKCA ( 1.4 %)	0.196262	0.144024	0.249619	0.161803	0.201612	0.139931	0.069055	0.0831581	0.0681664	0.219685	0.171345	0.139931	0.234433	0.200087	0.0708297	0.170554	0.0849058	0.0574367	0.0474927	0.0392786	0.0663866	0.0438507	0.11917	0.0374437	0.0529296	0.0909969	0.0770145	0.078774	0.0574367	0.0927298	0.0663866	0.072601	0.0300688	0.078774	0.0663866	0.0796524	0.0805301	0.0465835	0.0654955
Interleukin-2 Signaling	637	47	260441	22.0971	44	0.299117	7.1786e-09	4.9659e-05	70.4545	NRAS (15.3 %) KRAS (12.5 %) GAB2 ( 5.6 %) MAP2K1 ( 5.6 %) PIK3CA ( 5.6 %) INPP5D ( 4.2 %) IL2RG ( 2.8 %) IL5RA ( 2.8 %) IL6R ( 2.8 %) JAK1 ( 2.8 %) JAK3 ( 2.8 %) RAF1 ( 2.8 %) CSF2 ( 1.4 %) HRAS ( 1.4 %) IL2RB ( 1.4 %) IL6ST ( 1.4 %) MAP2K2 ( 1.4 %) MAPK3 ( 1.4 %) PIK3CD ( 1.4 %) PIK3R1 ( 1.4 %) PTK2B ( 1.4 %) SHC1 ( 1.4 %) STAT5A ( 1.4 %) SYK ( 1.4 %)	0.56332	0.445538	0.663467	0.487962	0.57424	0.435416	0.237658	0.280537	0.234895	0.609652	0.509717	0.435416	0.636901	0.571148	0.243155	0.50794	0.285725	0.200944	0.168501	0.140979	0.229338	0.156379	0.381966	0.13474	0.186357	0.303588	0.262083	0.267403	0.200944	0.308609	0.229338	0.248612	0.109329	0.267403	0.229338	0.270049	0.272685	0.165487	0.226545
MTOR Signaling Pathway	1429	66	458106	29.2427	50	0.232952	7.91989e-08	0.000517433	58	BRAF (18.1 %) NRAS (15.3 %) KRAS (12.5 %) MAP2K1 ( 5.6 %) RPTOR ( 5.6 %) TSC2 ( 4.2 %) YWHAG ( 4.2 %) CCNE1 ( 2.8 %) MAPKAP1 ( 2.8 %) PLD1 ( 2.8 %) RAF1 ( 2.8 %) RRAGC ( 2.8 %) SGK1 ( 2.8 %) ULK1 ( 2.8 %) ATG13 ( 1.4 %) BNIP3 ( 1.4 %) BTRC ( 1.4 %) CLIP1 ( 1.4 %) EEF2 ( 1.4 %) FBXW11 ( 1.4 %) HRAS ( 1.4 %) IRS1 ( 1.4 %) MAP2K2 ( 1.4 %) MAPK3 ( 1.4 %) MTOR ( 1.4 %) PRKCA ( 1.4 %) RICTOR ( 1.4 %) S…	0.714571	0.590336	0.807558	0.636823	0.725303	0.578966	0.336762	0.392389	0.333121	0.759127	0.659917	0.578966	0.78411	0.722279	0.343985	0.65805	0.399006	0.287836	0.243628	0.205425	0.325778	0.226881	0.517208	0.196677	0.268071	0.421603	0.368651	0.375526	0.287836	0.427902	0.325778	0.351129	0.16071	0.375526	0.325778	0.378936	0.382327	0.239476	0.322077
Trk Receptor Signaling Mediated By PI3K And PLC-gamma	1209	36	228615	16.1116	35	0.336928	9.9227e-08	0.000614163	85.7143	NRAS (15.3 %) KRAS (12.5 %) PIK3CA ( 5.6 %) YWHAG ( 4.2 %) NGF ( 2.8 %) CAMK2A ( 1.4 %) EPB41L1 ( 1.4 %) FOXO3 ( 1.4 %) HRAS ( 1.4 %) PIK3R1 ( 1.4 %) PLCG1 ( 1.4 %) SFN ( 1.4 %) SHC1 ( 1.4 %) SRC ( 1.4 %) STAT5A ( 1.4 %) TRPV1 ( 1.4 %)	0.416762	0.318711	0.507705	0.353102	0.426296	0.310644	0.161869	0.192855	0.159893	0.457814	0.371123	0.310644	0.482753	0.423588	0.165806	0.36964	0.196646	0.135819	0.113146	0.0941534	0.155928	0.104755	0.26885	0.0898778	0.125586	0.209778	0.179442	0.183297	0.135819	0.21349	0.155928	0.169725	0.072573	0.183297	0.155928	0.185217	0.187133	0.111056	0.153938
CXCR3-mediated Signaling Events	220	38	249530	18.0052	37	0.312804	1.62475e-07	0.000955356	89.1892	NRAS (15.3 %) KRAS (12.5 %) MAP2K1 ( 5.6 %) PIK3CA ( 5.6 %) MAPKAP1 ( 2.8 %) RAF1 ( 2.8 %) CCL11 ( 1.4 %) GNAO1 ( 1.4 %) GNAZ ( 1.4 %) HRAS ( 1.4 %) MAP2K2 ( 1.4 %) MAPK3 ( 1.4 %) MTOR ( 1.4 %) PIK3R1 ( 1.4 %) RICTOR ( 1.4 %) SRC ( 1.4 %)	0.464757	0.359107	0.560251	0.396458	0.474886	0.350301	0.185113	0.219933	0.182886	0.508182	0.415906	0.350301	0.534309	0.472012	0.189549	0.414309	0.22418	0.15568	0.129946	0.108309	0.178413	0.120395	0.304421	0.103428	0.144078	0.238862	0.204886	0.209215	0.15568	0.243006	0.178413	0.193961	0.0836354	0.209215	0.178413	0.21137	0.21352	0.127568	0.176167
GRB2 Events In EGFR Signaling// RAF/MAP Kinase Cascade// SHC-mediated Signalling// SHC-related Events// SHC-related Events Triggered By IGF1R// SHC1 Events In EGFR Signaling// SOS-mediated Signalling	494	31	209673	18.8754	38	0.303887	1.74455e-07	0.000976949	68.4211	IRS2 (18.1 %) NRAS (15.3 %) KRAS (12.5 %) EGFR ( 6.9 %) MAP2K1 ( 5.6 %) IL6R ( 2.8 %) JAK1 ( 2.8 %) RAF1 ( 2.8 %) HRAS ( 1.4 %) IGF1R ( 1.4 %) IL6ST ( 1.4 %) IRS1 ( 1.4 %) MAP2K2 ( 1.4 %) MAPK3 ( 1.4 %) SHC1 ( 1.4 %) SHC3 ( 1.4 %)	0.486341	0.377612	0.583411	0.416198	0.496695	0.368493	0.196024	0.232589	0.193682	0.530637	0.436226	0.368493	0.557167	0.493758	0.200689	0.434584	0.237041	0.165037	0.137885	0.115015	0.188977	0.127794	0.320853	0.109851	0.152803	0.252421	0.216801	0.221345	0.165037	0.256758	0.188977	0.205326	0.0888911	0.221345	0.188977	0.223607	0.225862	0.135373	0.186614
SHP2 Signaling	1024	58	417451	30.8604	51	0.218168	1.88258e-07	0.00100632	66.6667	NRAS (15.3 %) KRAS (12.5 %) EGFR ( 6.9 %) GAB2 ( 5.6 %) MAP2K1 ( 5.6 %) NOS3 ( 5.6 %) PDGFRB ( 5.6 %) PIK3CA ( 5.6 %) TEK ( 4.2 %) ANGPT1 ( 2.8 %) ARHGAP35 ( 2.8 %) IL2RG ( 2.8 %) IL6R ( 2.8 %) JAK1 ( 2.8 %) JAK3 ( 2.8 %) NGF ( 2.8 %) RAF1 ( 2.8 %) STAT1 ( 2.8 %) BDNF ( 1.4 %) HRAS ( 1.4 %) IFNGR1 ( 1.4 %) IGF1R ( 1.4 %) IL2RB ( 1.4 %) IL6ST ( 1.4 %) IRS1 ( 1.4 %) KDR ( 1.4 %) MAP2K2 ( 1.4 %) NTR…	0.744568	0.621467	0.833691	0.667983	0.755005	0.610017	0.360448	0.418616	0.356625	0.787657	0.690899	0.610017	0.811518	0.752068	0.368026	0.689051	0.425505	0.308927	0.262103	0.221443	0.34891	0.244301	0.547359	0.212107	0.288023	0.448979	0.393849	0.401031	0.308927	0.455508	0.34891	0.375514	0.173631	0.401031	0.34891	0.40459	0.408128	0.257692	0.345018
ARMS-mediated Activation	29	7	44420	5.05696	18	0.551383	2.84809e-07	0.00145624	94.4444	BRAF (18.1 %) KIDINS220 ( 4.2 %) NGF ( 2.8 %)	0.122241	0.0886294	0.157496	0.0999739	0.125733	0.0860312	0.0418031	0.0504924	0.0412574	0.137598	0.106102	0.0860312	0.147362	0.124736	0.0428936	0.105593	0.051573	0.0346845	0.0286198	0.0236295	0.040165	0.026405	0.0729288	0.022517	0.0319325	0.0553455	0.0467006	0.0477855	0.0346845	0.0564205	0.040165	0.0439829	0.0180545	0.0477855	0.040165	0.0483275	0.0488692	0.0280666	0.0396184
PDGFR-beta Signaling Pathway	822	125	847141	38.826	58	0.174306	3.57998e-07	0.00175419	55.1724	BRAF (18.1 %) NRAS (15.3 %) KRAS (12.5 %) DOCK4 (11.1 %) MAP2K1 ( 5.6 %) PDGFRB ( 5.6 %) PIK3CA ( 5.6 %) ACTN4 ( 4.2 %) PPP2R2B ( 4.2 %) RASA1 ( 4.2 %) VAV2 ( 4.2 %) YWHAG ( 4.2 %) ABL1 ( 2.8 %) ARHGAP35 ( 2.8 %) BLK ( 2.8 %) IQGAP1 ( 2.8 %) RAF1 ( 2.8 %) STAT1 ( 2.8 %) STAT3 ( 2.8 %) ARAP1 ( 1.4 %) ARPC2 ( 1.4 %) CYFIP2 ( 1.4 %) DNM2 ( 1.4 %) EPS8 ( 1.4 %) FGR ( 1.4 %) GRB10 ( 1.4 %) HCK ( 1.4 %…	0.866835	0.761906	0.929354	0.803831	0.874794	0.75119	0.483312	0.551203	0.478743	0.898642	0.8235	0.75119	0.915007	0.87257	0.492331	0.821939	0.559036	0.420658	0.361744	0.309112	0.469483	0.338866	0.689931	0.296839	0.394585	0.585392	0.522674	0.531005	0.420658	0.592629	0.469483	0.501192	0.245526	0.531005	0.469483	0.535116	0.539191	0.3561	0.464792
GRB2 Events In ERBB2 Signaling// SHC1 Events In ERBB2 Signaling// SHC1 Events In ERBB4 Signaling	495	32	207944	18.3222	35	0.281089	3.62146e-06	0.0170353	74.2857	NRAS (15.3 %) KRAS (12.5 %) EGFR ( 6.9 %) MAP2K1 ( 5.6 %) ERBB4 ( 2.8 %) IL6R ( 2.8 %) JAK1 ( 2.8 %) NRG3 ( 2.8 %) RAF1 ( 2.8 %) ERBB3 ( 1.4 %) EREG ( 1.4 %) HRAS ( 1.4 %) IL6ST ( 1.4 %) MAP2K2 ( 1.4 %) MAPK3 ( 1.4 %) NRG2 ( 1.4 %) SHC1 ( 1.4 %)	0.472657	0.365855	0.568762	0.403665	0.482871	0.356932	0.189071	0.224529	0.186802	0.516415	0.42333	0.356932	0.5427	0.479973	0.193591	0.421716	0.228851	0.159072	0.132822	0.110737	0.182245	0.123075	0.310402	0.105753	0.14724	0.243788	0.209211	0.213618	0.159072	0.248003	0.182245	0.198085	0.0855375	0.213618	0.182245	0.215813	0.218001	0.130396	0.179957
IGF1R Signaling Cascade// Insulin Receptor Signalling Cascade// IRS-mediated Signalling// IRS-related Events// IRS-related Events Triggered By IGF1R// Signaling By Type 1 Insulin-like Growth Factor 1 Receptor (IGF1R)	573	95	608049	31.3018	49	0.194626	4.37316e-06	0.0189854	55.102	IRS2 (18.1 %) NRAS (15.3 %) KRAS (12.5 %) MAP2K1 ( 5.6 %) PIK3CA ( 5.6 %) RPTOR ( 5.6 %) KLB ( 4.2 %) TSC2 ( 4.2 %) EIF4G1 ( 2.8 %) FGF22 ( 2.8 %) FGF4 ( 2.8 %) IL6R ( 2.8 %) JAK1 ( 2.8 %) KL ( 2.8 %) PIK3R4 ( 2.8 %) RAF1 ( 2.8 %) STRADA ( 2.8 %) FGF1 ( 1.4 %) FGF17 ( 1.4 %) FGF6 ( 1.4 %) FGF9 ( 1.4 %) FGFR1 ( 1.4 %) GRB10 ( 1.4 %) HRAS ( 1.4 %) IGF1R ( 1.4 %) IL6ST ( 1.4 %) IRS1 ( 1.4 %) IRS4 ( …	0.75246	0.629829	0.840412	0.676295	0.762802	0.618371	0.366988	0.425822	0.363117	0.795091	0.699132	0.618371	0.818613	0.759892	0.37466	0.697292	0.432781	0.314774	0.267243	0.225911	0.355303	0.249153	0.555535	0.216414	0.293563	0.456479	0.400786	0.408049	0.314774	0.463066	0.355303	0.382239	0.177248	0.408049	0.355303	0.411647	0.415223	0.262761	0.35136
EGF Receptor (ErbB1) Signaling Pathway	373	32	247227	20.1636	37	0.263635	4.45034e-06	0.0189854	89.1892	NRAS (15.3 %) KRAS (12.5 %) EGFR ( 6.9 %) PIK3CA ( 5.6 %) RASA1 ( 4.2 %) GSN ( 2.8 %) PTK2 ( 2.8 %) STAT1 ( 2.8 %) STAT3 ( 2.8 %) TLN1 ( 2.8 %) HRAS ( 1.4 %) MAPK3 ( 1.4 %) PIK3R1 ( 1.4 %) PLCG1 ( 1.4 %) SHC1 ( 1.4 %) SRC ( 1.4 %)	0.517694	0.404897	0.616509	0.445159	0.528326	0.395347	0.212438	0.251557	0.209927	0.563028	0.46596	0.395347	0.589989	0.525312	0.217438	0.464256	0.256308	0.179154	0.149893	0.125179	0.204879	0.138996	0.345246	0.11959	0.16598	0.272701	0.234688	0.239546	0.179154	0.277318	0.204879	0.222406	0.0968745	0.239546	0.204879	0.241963	0.244373	0.147182	0.202343
Signaling By Interleukins	1054	111	621163	31.3293	49	0.194245	4.52033e-06	0.0189854	63.2653	NRAS (15.3 %) KRAS (12.5 %) GAB2 ( 5.6 %) MAP2K1 ( 5.6 %) PIK3CA ( 5.6 %) CHUK ( 4.2 %) INPP5D ( 4.2 %) IL2RG ( 2.8 %) IL5RA ( 2.8 %) IL6R ( 2.8 %) JAK1 ( 2.8 %) JAK3 ( 2.8 %) PRKACG ( 2.8 %) RAF1 ( 2.8 %) STAT1 ( 2.8 %) STAT3 ( 2.8 %) BTRC ( 1.4 %) CASP1 ( 1.4 %) CRKL ( 1.4 %) CSF2 ( 1.4 %) HCK ( 1.4 %) HRAS ( 1.4 %) IL18 ( 1.4 %) IL2RB ( 1.4 %) IL6ST ( 1.4 %) IL7 ( 1.4 %) IRAK3 ( 1.4 %) IRAK4 (…	0.752947	0.630348	0.840824	0.676809	0.763283	0.618889	0.367396	0.426271	0.363522	0.795548	0.699641	0.618889	0.81905	0.760375	0.375074	0.697802	0.433234	0.315139	0.267564	0.226191	0.355702	0.249456	0.556043	0.216684	0.29391	0.456946	0.401219	0.408486	0.315139	0.463537	0.355702	0.382658	0.177474	0.408486	0.355702	0.412087	0.415665	0.263078	0.351756
Regulation Of Ras Family Activation	968	33	253690	12.7653	27	0.325332	1.30069e-05	0.0523512	92.5926	NRAS (15.3 %) KRAS (12.5 %) RASA1 ( 4.2 %) DAB2IP ( 1.4 %) HRAS ( 1.4 %) PRKCA ( 1.4 %) PRKCB ( 1.4 %) RASA2 ( 1.4 %) RASAL1 ( 1.4 %) RASGRP4 ( 1.4 %) RIN1 ( 1.4 %)	0.329048	0.247267	0.408163	0.275579	0.337182	0.24068	0.122515	0.146643	0.120985	0.364331	0.29057	0.24068	0.386104	0.334868	0.125568	0.289333	0.149612	0.10241	0.0850382	0.0705753	0.117916	0.0786382	0.206869	0.0673304	0.0945549	0.159922	0.13617	0.139175	0.10241	0.162845	0.117916	0.12861	0.0542371	0.139175	0.117916	0.140674	0.14217	0.0834424	0.116377
ErbB2/ErbB3 Signaling Events	410	41	294955	20.1066	36	0.252964	1.33549e-05	0.0523512	75	NRAS (15.3 %) KRAS (12.5 %) MAP2K1 ( 5.6 %) PIK3CA ( 5.6 %) CHRNE ( 4.2 %) DOCK7 ( 2.8 %) RAF1 ( 2.8 %) STAT3 ( 2.8 %) ERBB3 ( 1.4 %) HRAS ( 1.4 %) MAP2K2 ( 1.4 %) MAPK3 ( 1.4 %) MTOR ( 1.4 %) NRG2 ( 1.4 %) PIK3R1 ( 1.4 %) RAC1 ( 1.4 %) RNF41 ( 1.4 %) SHC1 ( 1.4 %) SRC ( 1.4 %)	0.516324	0.403694	0.615075	0.443885	0.526944	0.394162	0.211706	0.250713	0.209202	0.561618	0.464654	0.394162	0.588563	0.523934	0.216691	0.462953	0.255451	0.178523	0.149356	0.124723	0.204169	0.138495	0.344166	0.119153	0.165391	0.271799	0.23389	0.238735	0.178523	0.276404	0.204169	0.221644	0.0965163	0.238735	0.204169	0.241146	0.243549	0.146653	0.201641
Signaling By Insulin Receptor	1053	114	687968	33.3696	50	0.175619	1.49687e-05	0.0567846	52	IRS2 (18.1 %) NRAS (15.3 %) KRAS (12.5 %) MAP2K1 ( 5.6 %) PIK3CA ( 5.6 %) RPTOR ( 5.6 %) ATP6V0A1 ( 4.2 %) KLB ( 4.2 %) TSC2 ( 4.2 %) EIF4G1 ( 2.8 %) FGF22 ( 2.8 %) FGF4 ( 2.8 %) IL6R ( 2.8 %) JAK1 ( 2.8 %) KL ( 2.8 %) PIK3R4 ( 2.8 %) RAF1 ( 2.8 %) STRADA ( 2.8 %) ATP6V0A2 ( 1.4 %) ATP6V0A4 ( 1.4 %) ATP6V0D1 ( 1.4 %) ATP6V1B1 ( 1.4 %) FGF1 ( 1.4 %) FGF17 ( 1.4 %) FGF6 ( 1.4 %) FGF9 ( 1.4 %) FGFR1…	0.787722	0.668184	0.8696	0.714087	0.797544	0.656763	0.398059	0.459836	0.393971	0.827898	0.73639	0.656763	0.849685	0.794785	0.406152	0.7346	0.467099	0.342698	0.291897	0.247424	0.385712	0.272465	0.593486	0.237168	0.320075	0.491756	0.43363	0.441244	0.342698	0.49859	0.385712	0.414136	0.194727	0.441244	0.385712	0.445013	0.448757	0.287088	0.381541
Spry Regulation Of FGF Signaling	1097	18	115582	7.92825	20	0.401853	1.81317e-05	0.0666339	90	BRAF (18.1 %) EGFR ( 6.9 %) MAPK3 ( 1.4 %) RPS27A ( 1.4 %) SRC ( 1.4 %) UBB ( 1.4 %)	0.198637	0.145826	0.252533	0.163805	0.204043	0.141686	0.0699571	0.0842358	0.0690573	0.222303	0.173452	0.141686	0.237199	0.202502	0.071754	0.172653	0.0860052	0.0581918	0.0481203	0.0398	0.0672551	0.0444314	0.120683	0.0379412	0.0536271	0.0921711	0.078016	0.0797974	0.0581918	0.0939251	0.0672551	0.0735475	0.0304699	0.0797974	0.0672551	0.0806868	0.0815754	0.0471994	0.0663527
FCERI Mediated MAPK Activation	423	49	268379	19.5435	35	0.253067	1.98206e-05	0.0706334	68.5714	NRAS (15.3 %) KRAS (12.5 %) MAP2K1 ( 5.6 %) VAV2 ( 4.2 %) IL6R ( 2.8 %) JAK1 ( 2.8 %) MAP3K1 ( 2.8 %) PAK2 ( 2.8 %) RAF1 ( 2.8 %) HRAS ( 1.4 %) IL6ST ( 1.4 %) MAP2K2 ( 1.4 %) MAP2K4 ( 1.4 %) MAP2K7 ( 1.4 %) MAPK3 ( 1.4 %) PLCG1 ( 1.4 %) RAC1 ( 1.4 %) SHC1 ( 1.4 %) SYK ( 1.4 %) VAV1 ( 1.4 %) VAV3 ( 1.4 %)	0.502692	0.39178	0.600754	0.431258	0.513199	0.382432	0.204498	0.242391	0.202067	0.547564	0.4517	0.382432	0.574342	0.51022	0.209336	0.450025	0.246999	0.172318	0.144074	0.12025	0.197185	0.133566	0.333494	0.114867	0.159597	0.262908	0.22604	0.230748	0.172318	0.267391	0.197185	0.214145	0.0930006	0.230748	0.197185	0.233091	0.235427	0.141459	0.194732
Negative Regulation Of FGFR Signaling	763	41	218005	14.6746	28	0.280593	7.0989e-05	0.231897	78.5714	BRAF (18.1 %) EGFR ( 6.9 %) KLB ( 4.2 %) FGF22 ( 2.8 %) FGF4 ( 2.8 %) KL ( 2.8 %) FGF1 ( 1.4 %) FGF17 ( 1.4 %) FGF6 ( 1.4 %) FGF9 ( 1.4 %) FGFR1 ( 1.4 %) MAPK3 ( 1.4 %) RPS27A ( 1.4 %) SRC ( 1.4 %) UBB ( 1.4 %)	0.379495	0.288003	0.465949	0.319908	0.388481	0.280545	0.144693	0.172741	0.142909	0.418313	0.336705	0.280545	0.442059	0.385926	0.148251	0.335321	0.176182	0.121205	0.100828	0.0838043	0.139329	0.0933012	0.242069	0.0799777	0.112001	0.188112	0.160585	0.164077	0.121205	0.191489	0.139329	0.151793	0.064511	0.164077	0.139329	0.165817	0.167553	0.098952	0.137534
ErbB1 Downstream Signaling	409	105	714254	37.0039	52	0.147756	7.89908e-05	0.251063	63.4615	BRAF (18.1 %) NRAS (15.3 %) KRAS (12.5 %) EGFR ( 6.9 %) MAP2K1 ( 5.6 %) PIK3CA ( 5.6 %) VAV2 ( 4.2 %) YWHAG ( 4.2 %) IQGAP1 ( 2.8 %) MAP3K1 ( 2.8 %) MAPKAP1 ( 2.8 %) MEF2C ( 2.8 %) PLD1 ( 2.8 %) RAF1 ( 2.8 %) RPS6KA5 ( 2.8 %) STAT1 ( 2.8 %) STAT3 ( 2.8 %) ARPC2 ( 1.4 %) CYFIP2 ( 1.4 %) EPS8 ( 1.4 %) HRAS ( 1.4 %) KSR1 ( 1.4 %) MAP2K2 ( 1.4 %) MAP2K4 ( 1.4 %) MAP3K2 ( 1.4 %) MAPK3 ( 1.4 %) MTOR ( …	0.842696	0.731931	0.91206	0.775571	0.851343	0.720883	0.454338	0.520487	0.449913	0.877538	0.796302	0.720883	0.895805	0.848922	0.463082	0.794651	0.52817	0.393929	0.337619	0.287677	0.440955	0.31587	0.658431	0.276077	0.368953	0.554106	0.492595	0.500726	0.393929	0.561251	0.440955	0.471685	0.227757	0.500726	0.440955	0.504742	0.508726	0.332247	0.436422
Glutamate Neurotransmitter Release Cycle	518	11	60041	8.04089	19	0.373449	8.48127e-05	0.262473	94.7368	STXBP1 (12.5 %) RIMS1 ( 8.3 %) SLC17A7 ( 2.8 %) UNC13B ( 2.8 %) SYT1 ( 1.4 %)	0.201677	0.148133	0.256257	0.166368	0.207154	0.143933	0.0711138	0.0856176	0.0701997	0.225651	0.17615	0.143933	0.240735	0.205593	0.0729393	0.175339	0.0874146	0.0591602	0.0489255	0.040469	0.0683688	0.0451763	0.122622	0.0385796	0.0545218	0.0936762	0.0793002	0.0811096	0.0591602	0.0954574	0.0683688	0.0747612	0.0309846	0.0811096	0.0683688	0.082013	0.0829155	0.0479896	0.067452
Neurotrophic Factor-mediated Trk Receptor Signaling	776	61	441920	29.0352	44	0.180528	8.73284e-05	0.263329	79.5455	NRAS (15.3 %) KRAS (12.5 %) GAB2 ( 5.6 %) MAP2K1 ( 5.6 %) PIK3CA ( 5.6 %) DOCK1 ( 4.2 %) RASA1 ( 4.2 %) ABL1 ( 2.8 %) MCF2L ( 2.8 %) NGF ( 2.8 %) RGS19 ( 2.8 %) STAT3 ( 2.8 %) ARHGAP32 ( 1.4 %) BDNF ( 1.4 %) CRKL ( 1.4 %) ELMO1 ( 1.4 %) HRAS ( 1.4 %) MAGED1 ( 1.4 %) MAPK3 ( 1.4 %) NEDD4L ( 1.4 %) NTRK3 ( 1.4 %) PIK3R1 ( 1.4 %) PLCG1 ( 1.4 %) RAC1 ( 1.4 %) SHC1 ( 1.4 %) SHC3 ( 1.4 %)	0.710603	0.586289	0.804033	0.632749	0.721366	0.574935	0.333756	0.389046	0.330138	0.755321	0.655853	0.574935	0.780434	0.718332	0.340932	0.653984	0.395626	0.285168	0.241299	0.20341	0.322845	0.224687	0.51332	0.194737	0.265551	0.418105	0.365444	0.372279	0.285168	0.424372	0.322845	0.34803	0.159088	0.372279	0.322845	0.375669	0.37904	0.237179	0.319168
Dopamine Neurotransmitter Release Cycle// Neurotransmitter Release Cycle// Norepinephrine Neurotransmitter Release Cycle// Serotonin Neurotransmitter Release Cycle	353	10	50139	6.73533	17	0.40209	9.36255e-05	0.275259	94.1176	STXBP1 (12.5 %) RIMS1 ( 8.3 %) MAOA ( 2.8 %) SYT1 ( 1.4 %)	0.166592	0.121651	0.213001	0.136894	0.171222	0.118149	0.0579369	0.0698555	0.0571869	0.1869	0.145097	0.118149	0.199738	0.169902	0.059435	0.144416	0.0713347	0.0481406	0.0397719	0.0328701	0.0556852	0.0367106	0.100429	0.0313297	0.0443457	0.0764934	0.0646598	0.0661472	0.0481406	0.077962	0.0556852	0.0609308	0.0251433	0.0661472	0.0556852	0.0668901	0.0676323	0.0390075	0.0549334
Acetylcholine Neurotransmitter Release Cycle	40	11	51068	6.16695	16	0.41405	0.000112603	0.322978	93.75	STXBP1 (12.5 %) RIMS1 ( 8.3 %) SLC18A3 ( 1.4 %) SYT1 ( 1.4 %)	0.151452	0.110323	0.194155	0.12425	0.155701	0.107127	0.0523659	0.0631774	0.051686	0.170109	0.131754	0.107127	0.181927	0.15449	0.0537241	0.131131	0.0645201	0.0434897	0.0359142	0.0296715	0.0503249	0.0331447	0.0909743	0.0282787	0.0400537	0.0692045	0.0584626	0.0598121	0.0434897	0.0705386	0.0503249	0.0550804	0.0226877	0.0598121	0.0503249	0.0604861	0.0611596	0.0352226	0.0496436
Amine Ligand-binding Receptors	108	40	133460	6.91654	17	0.39056	0.000133764	0.37454	82.3529	HTR4 (6.9 %) HTR2B (2.8 %) ADRA1B (1.4 %) DRD1 (1.4 %) DRD2 (1.4 %) HTR1A (1.4 %) HTR1F (1.4 %) HTR5A (1.4 %) TAAR1 (1.4 %) TAAR2 (1.4 %) TAAR5 (1.4 %) TAAR6 (1.4 %) TAAR8 (1.4 %)	0.171439	0.12529	0.219011	0.140952	0.176189	0.121691	0.0597349	0.0720091	0.0589624	0.192267	0.149376	0.121691	0.205426	0.174835	0.061278	0.148677	0.073532	0.0496426	0.0410185	0.0339042	0.0574154	0.0378631	0.103472	0.0323161	0.0457322	0.0788427	0.0666589	0.0681907	0.0496426	0.0803545	0.0574154	0.0628185	0.0259375	0.0681907	0.0574154	0.0689556	0.0697199	0.0402306	0.056641
Signaling By FGFR Mutants	1049	44	303612	25.7623	40	0.191075	0.000152281	0.408692	75	NRAS (15.3 %) KRAS (12.5 %) CNTRL ( 5.6 %) GAB2 ( 5.6 %) PIK3CA ( 5.6 %) FGF22 ( 2.8 %) FGF4 ( 2.8 %) STAT1 ( 2.8 %) STAT3 ( 2.8 %) TRIM24 ( 2.8 %) BCR ( 1.4 %) CUX1 ( 1.4 %) FGF1 ( 1.4 %) FGF17 ( 1.4 %) FGF6 ( 1.4 %) FGF9 ( 1.4 %) FGFR1 ( 1.4 %) FGFR1OP ( 1.4 %) HRAS ( 1.4 %) MYO18A ( 1.4 %) PIK3R1 ( 1.4 %) PLCG1 ( 1.4 %) STAT5A ( 1.4 %)	0.644545	0.521091	0.743228	0.566392	0.655607	0.510152	0.287348	0.337034	0.284122	0.690989	0.589269	0.510152	0.71768	0.652482	0.293757	0.58741	0.342996	0.244249	0.205751	0.172799	0.277626	0.191271	0.451594	0.165292	0.226987	0.363444	0.315738	0.321891	0.244249	0.369169	0.277626	0.300109	0.134579	0.321891	0.277626	0.324947	0.32799	0.202156	0.274356
Signaling By ERBB4	1048	153	999043	41.715	55	0.120071	0.000331855	0.848394	56.3636	IRS2 (18.1 %) NRAS (15.3 %) KRAS (12.5 %) EGFR ( 6.9 %) TNRC6B ( 6.9 %) MAP2K1 ( 5.6 %) PDGFRB ( 5.6 %) PIK3CA ( 5.6 %) CHUK ( 4.2 %) GHR ( 4.2 %) KLB ( 4.2 %) TSC2 ( 4.2 %) CD19 ( 2.8 %) ERBB4 ( 2.8 %) FGF22 ( 2.8 %) FGF4 ( 2.8 %) IL6R ( 2.8 %) JAK1 ( 2.8 %) KL ( 2.8 %) MAPKAP1 ( 2.8 %) NRG3 ( 2.8 %) PGR ( 2.8 %) RAF1 ( 2.8 %) WWOX ( 2.8 %) AGO1 ( 1.4 %) AGO4 ( 1.4 %) BTRC ( 1.4 %) CSH1 ( 1.4 %)…	0.900411	0.806387	0.951779	0.844871	0.907192	0.796386	0.530211	0.600139	0.525455	0.927122	0.862533	0.796386	0.94042	0.905303	0.539581	0.861141	0.608114	0.464483	0.401735	0.344963	0.515798	0.377137	0.738077	0.331633	0.436821	0.634795	0.570927	0.579485	0.464483	0.642078	0.515798	0.548763	0.275544	0.579485	0.515798	0.583699	0.587872	0.395678	0.510896
Inwardly Rectifying K+ Channels	644	11	57756	6.07956	15	0.392219	0.000353706	0.885018	100	KCNJ2 (6.9 %) KCNJ1 (4.2 %) KCNJ4 (4.2 %) KCNJ8 (2.8 %) ABCC8 (1.4 %) KCNJ16 (1.4 %)	0.149134	0.108593	0.19126	0.122317	0.153324	0.105445	0.0515187	0.0621611	0.0508496	0.167534	0.129714	0.105445	0.179194	0.152129	0.0528556	0.1291	0.063483	0.0427829	0.0353283	0.0291858	0.0495099	0.0326031	0.0895328	0.0278156	0.0394016	0.0680949	0.0575199	0.0588483	0.0427829	0.0694084	0.0495099	0.0541906	0.022315	0.0588483	0.0495099	0.0595118	0.0601748	0.0346477	0.0488393
Plasma Membrane Estrogen Receptor Signaling	857	41	301665	19.4134	32	0.217048	0.000389376	0.953972	81.25	NRAS (15.3 %) KRAS (12.5 %) NOS3 ( 5.6 %) PIK3CA ( 5.6 %) ESR2 ( 2.8 %) GNA11 ( 1.4 %) GNAO1 ( 1.4 %) GNAQ ( 1.4 %) GNAZ ( 1.4 %) HRAS ( 1.4 %) IGF1R ( 1.4 %) MMP2 ( 1.4 %) MMP9 ( 1.4 %) PIK3R1 ( 1.4 %) PLCB2 ( 1.4 %) PLCB3 ( 1.4 %) SHC1 ( 1.4 %) SRC ( 1.4 %)	0.499525	0.389025	0.597408	0.428333	0.510003	0.379721	0.202842	0.240478	0.200429	0.544291	0.448698	0.379721	0.571025	0.507032	0.207647	0.447029	0.245055	0.170894	0.142863	0.119225	0.19558	0.132437	0.331032	0.113884	0.158268	0.260861	0.224236	0.228911	0.170894	0.265316	0.19558	0.212422	0.0921956	0.228911	0.19558	0.231239	0.233559	0.140268	0.193145
Class I PI3K Signaling Events	270	45	295820	21.8394	34	0.192238	0.000769615	1.80429	76.4706	NRAS (15.3 %) KRAS (12.5 %) PIK3CA ( 5.6 %) ARAP3 ( 4.2 %) INPP5D ( 4.2 %) BLK ( 2.8 %) SGK1 ( 2.8 %) FGR ( 1.4 %) FOXO3 ( 1.4 %) HCK ( 1.4 %) HRAS ( 1.4 %) ITK ( 1.4 %) PIK3CG ( 1.4 %) PIK3R1 ( 1.4 %) PLCG1 ( 1.4 %) PLEKHA1 ( 1.4 %) RAC1 ( 1.4 %) SRC ( 1.4 %) SYK ( 1.4 %)	0.557342	0.440146	0.657399	0.482307	0.568233	0.430095	0.234256	0.27664	0.231526	0.60358	0.50395	0.430095	0.630814	0.565149	0.239687	0.502181	0.28177	0.197998	0.16598	0.138834	0.226037	0.154022	0.377067	0.132683	0.183599	0.299441	0.258394	0.263653	0.197998	0.30441	0.226037	0.24508	0.107636	0.263653	0.226037	0.266269	0.268876	0.163006	0.223278
Growth Hormone Receptor Signaling	535	24	129441	10.1675	20	0.293816	0.000796131	1.80429	75	IRS2 (18.1 %) GHR ( 4.2 %) STAT1 ( 2.8 %) STAT3 ( 2.8 %) CSH1 ( 1.4 %) GH2 ( 1.4 %) IRS1 ( 1.4 %) MAPK3 ( 1.4 %) STAT5A ( 1.4 %)	0.259203	0.192294	0.325889	0.215243	0.265966	0.186986	0.0935891	0.112392	0.0924008	0.288688	0.227484	0.186986	0.307084	0.26404	0.0959611	0.226472	0.114715	0.0780187	0.0646351	0.0535404	0.0900195	0.0597203	0.159915	0.0510571	0.0719592	0.122797	0.104214	0.106558	0.0780187	0.125092	0.0900195	0.0983269	0.0410586	0.106558	0.0900195	0.107728	0.108897	0.0634088	0.0888265
Synaptic_vesicle_trafficking	1106	19	123541	11.9295	22	0.265799	0.00104715	2.28046	95.4545	STXBP1 (12.5 %) RIMS1 ( 8.3 %) UNC13C ( 4.2 %) STX1B ( 2.8 %) UNC13B ( 2.8 %) STX2 ( 1.4 %) SYT1 ( 1.4 %) SYT2 ( 1.4 %)	0.306693	0.229501	0.382111	0.256142	0.314413	0.223314	0.113046	0.135456	0.111626	0.340232	0.270284	0.223314	0.361004	0.312216	0.115878	0.269116	0.138218	0.0944097	0.0783354	0.0649718	0.108779	0.0724198	0.191627	0.0619758	0.0871383	0.147813	0.125722	0.128515	0.0944097	0.150534	0.108779	0.118702	0.0498958	0.128515	0.108779	0.129907	0.131298	0.0768601	0.107353
GABA Synthesis// Release// Reuptake And Degradation	485	19	103978	10.8305	20	0.26638	0.00190211	4.06705	85	STXBP1 (12.5 %) RIMS1 ( 8.3 %) SLC32A1 ( 2.8 %) ALDH5A1 ( 1.4 %) GAD2 ( 1.4 %) SLC6A1 ( 1.4 %) SLC6A11 ( 1.4 %) SLC6A13 ( 1.4 %) SYT1 ( 1.4 %)	0.277117	0.206246	0.347234	0.23061	0.284252	0.200602	0.100827	0.120985	0.0995518	0.308185	0.243582	0.200602	0.327517	0.28222	0.103372	0.24251	0.123472	0.084109	0.0697205	0.0577802	0.0969962	0.0644325	0.171774	0.055106	0.0775966	0.132124	0.112222	0.114734	0.084109	0.13458	0.0969962	0.105909	0.0443333	0.114734	0.0969962	0.115988	0.11724	0.0684013	0.0957157
EPHB Forward Signaling	380	39	288854	22.8153	34	0.173253	0.00194715	4.06718	76.4706	NRAS (15.3 %) KRAS (12.5 %) MAP2K1 ( 5.6 %) PIK3CA ( 5.6 %) KALRN ( 4.2 %) RASA1 ( 4.2 %) EPHB1 ( 2.8 %) EPHB4 ( 2.8 %) ITSN1 ( 2.8 %) PTK2 ( 2.8 %) HRAS ( 1.4 %) MAPK3 ( 1.4 %) PIK3R1 ( 1.4 %) PXN ( 1.4 %) RAC1 ( 1.4 %) SHC1 ( 1.4 %) SRC ( 1.4 %) TF ( 1.4 %)	0.579796	0.460511	0.680058	0.503627	0.590787	0.450201	0.247201	0.29145	0.244346	0.626331	0.525674	0.450201	0.653581	0.587676	0.25288	0.523875	0.296795	0.209222	0.175593	0.147017	0.238602	0.163013	0.395619	0.140534	0.19411	0.315187	0.27242	0.277909	0.209222	0.320353	0.238602	0.258516	0.114103	0.277909	0.238602	0.280638	0.283356	0.172466	0.235714
TCR Signaling In NaÃ¯ve CD4+ T Cells	1146	65	435980	25.6082	37	0.159823	0.00197134	4.06718	72.973	NRAS (15.3 %) KRAS (12.5 %) FLNA ( 5.6 %) GAB2 ( 5.6 %) CHUK ( 4.2 %) INPP5D ( 4.2 %) CARD11 ( 1.4 %) CD3G ( 1.4 %) CD4 ( 1.4 %) FYB ( 1.4 %) HLA-DRB1 ( 1.4 %) HRAS ( 1.4 %) ITK ( 1.4 %) MALT1 ( 1.4 %) PLCG1 ( 1.4 %) PRKCA ( 1.4 %) PRKCB ( 1.4 %) PRKCQ ( 1.4 %) PTPRC ( 1.4 %) RASSF5 ( 1.4 %) SHC1 ( 1.4 %) TRPV6 ( 1.4 %) VAV1 ( 1.4 %)	0.641276	0.517961	0.740121	0.563174	0.652344	0.507049	0.285209	0.334619	0.282002	0.687761	0.586022	0.507049	0.714503	0.649217	0.291581	0.584165	0.34055	0.242374	0.204131	0.171409	0.275544	0.18975	0.448671	0.163957	0.225224	0.360895	0.313437	0.319557	0.242374	0.366592	0.275544	0.297895	0.133471	0.319557	0.275544	0.322596	0.325622	0.20056	0.272294
Potassium Channels	879	79	474322	32.5998	44	0.130237	0.00240444	4.87521	63.6364	KCNH3 (15.3 %) KCNJ2 ( 6.9 %) KCNH2 ( 5.6 %) KCNMA1 ( 5.6 %) KCNJ1 ( 4.2 %) KCNJ4 ( 4.2 %) KCNK3 ( 4.2 %) KCNN3 ( 4.2 %) HCN4 ( 2.8 %) KCNA1 ( 2.8 %) KCNA5 ( 2.8 %) KCNAB1 ( 2.8 %) KCNC1 ( 2.8 %) KCNC2 ( 2.8 %) KCNC4 ( 2.8 %) KCND1 ( 2.8 %) KCNG1 ( 2.8 %) KCNH6 ( 2.8 %) KCNJ8 ( 2.8 %) KCNK16 ( 2.8 %) KCNK9 ( 2.8 %) KCNQ2 ( 2.8 %) KCNQ3 ( 2.8 %) KCNS1 ( 2.8 %) ABCC8 ( 1.4 %) HCN1 ( 1.4 %) KCNB1 ( …	0.774927	0.654069	0.859173	0.700244	0.784957	0.642619	0.386409	0.447126	0.3824	0.816073	0.722778	0.642619	0.838534	0.782138	0.394349	0.720967	0.45428	0.3322	0.282606	0.239302	0.374304	0.263673	0.57943	0.22933	0.310097	0.478599	0.421339	0.428827	0.3322	0.485346	0.374304	0.402187	0.188114	0.428827	0.374304	0.432535	0.436218	0.277919	0.370216
Downstream Signaling Events Of B Cell Receptor (BCR)	361	168	1062903	40.8359	52	0.104961	0.0024779	4.939	63.4615	IRS2 (18.1 %) NRAS (15.3 %) KRAS (12.5 %) EGFR ( 6.9 %) TNRC6B ( 6.9 %) PDGFRB ( 5.6 %) PIK3CA ( 5.6 %) CHUK ( 4.2 %) KLB ( 4.2 %) TSC2 ( 4.2 %) CD19 ( 2.8 %) ERBB4 ( 2.8 %) FGF22 ( 2.8 %) FGF4 ( 2.8 %) KL ( 2.8 %) MAPKAP1 ( 2.8 %) NRG3 ( 2.8 %) PSME4 ( 2.8 %) AGO1 ( 1.4 %) AGO4 ( 1.4 %) BTRC ( 1.4 %) CARD11 ( 1.4 %) ERBB3 ( 1.4 %) EREG ( 1.4 %) FBXW11 ( 1.4 %) FGF1 ( 1.4 %) FGF17 ( 1.4 %) FGF6 (…	0.890802	0.793266	0.945572	0.832886	0.897949	0.783024	0.515822	0.585231	0.511117	0.919087	0.851196	0.783024	0.933316	0.895956	0.525096	0.84975	0.593176	0.450959	0.389334	0.333803	0.501569	0.365249	0.723682	0.320792	0.423759	0.619804	0.556181	0.564683	0.450959	0.627087	0.501569	0.534193	0.266158	0.564683	0.501569	0.568872	0.573021	0.3834	0.496725
[truncated: 33 more columns]
