# Supplementary material for: Genome-wide chemical mutagenesis screens allow unbiased saturation of the cancer genome and identification of drug resistance mutations
Source: Genome Res. 2017 Apr;27(4):613–25. doi: 10.1101/gr.213546.116 (PMC5378179; doi:10.1101/gr.213546.116)
Supplement: Supplemental Material [file supp_gr.213546.116_Supplemental_Table_S4.xlsx]

## Sheet: Supp Table S4
Cetuximab Resistant Clone	Gene	Mutation	Chrom	Pos	Ref	Alt	CDS	FATHMM Prediction	FATHMM Score	COSMIC Freq	Parental Cell Line					Clinically detected
											X coverage at locus	%A	%C	%G	%T
CCK-81_ENU_Pilot_10	BRAF	V600E	7	140453136	A	T	c.1799T>A	Cancer	-1.82	34694	176	100	0	0	0	Yes
CCK-81_ENU_Pilot_26	BRAF	V600E	7	140453136	A	T	c.1799T>A	Cancer	-1.82	34694	176	100	0	0	0	Yes
NCI-H508_ENU_Flat_10	BRAF	V600E	7	140453136	A	T	c.1799T>A	Cancer	-1.82	34694	23	100	0	0	0	Yes
NCI-H508_ENU_Flat_11	BRAF	V600E	7	140453136	A	T	c.1799T>A	Cancer	-1.82	34694	23	100	0	0	0	Yes
NCI-H508_ENU_Flat_15	BRAF	V600E	7	140453136	A	T	c.1799T>A	Cancer	-1.82	34694	23	100	0	0	0	Yes
NCI-H508_ENU_Flat_20	BRAF	V600E	7	140453136	A	T	c.1799T>A	Cancer	-1.82	34694	23	100	0	0	0	Yes
NCI-H508_ENU_Flat_7	BRAF	V600E	7	140453136	A	T	c.1799T>A	Cancer	-1.82	34694	23	100	0	0	0	Yes
NCI-H508_ENU_Flat_9	BRAF	V600E	7	140453136	A	T	c.1799T>A	Cancer	-1.82	34694	23	100	0	0	0	Yes
NCI-H508-ENU-Cetuximab-12	BRAF	V600E	7	140453136	A	T	c.1799T>A	Cancer	-1.82	34694	23	100	0	0	0	Yes
NCI-H508-ENU-Cetuximab-17	BRAF	V600E	7	140453136	A	T	c.1799T>A	Cancer	-1.82	34694	23	100	0	0	0	Yes
NCI-H508-ENU-Cetuximab-22	BRAF	V600E	7	140453136	A	T	c.1799T>A	Cancer	-1.82	34694	23	100	0	0	0	Yes
NCI-H508-ENU-Cetuximab-24	BRAF	V600E	7	140453136	A	T	c.1799T>A	Cancer	-1.82	34694	23	100	0	0	0	Yes
CCK-81_ENU_Pilot_15	EGFR	S442R	7	55227859	C	A	c.1326C>A	Passenger	-0.72	0	133	0	100	0	0	Yes
CCK-81_ENU_Pilot_3	EGFR	I491K	7	55228005	T	A	c.1472T>A	Cancer	-0.82	0	113	0	0	0	100	Yes
NCI-H508-ENU-Cetuximab-26	EGFR	Q486E	7	55227989	C	G	c.1456C>G	Passenger	-0.46	0	60	0	100	0	0	No
NCI-H508-ENU-Cetuximab-42	HRAS	D47G	11	533916	T	C	c.140A>G	Cancer	-2.55	0	252	0	0	0	100	No
CCK-81_ENU_Pilot_18	KRAS	G12C	12	25398285	C	A	c.34G>T	Cancer	-2.37	3574	64	0	98.4375	1.5625	0	Yes
CCK-81_ENU_Pilot_27	KRAS	G12C	12	25398285	C	A	c.34G>T	Cancer	-2.37	3574	64	0	98.4375	1.5625	0	Yes
CCK-81_ENU_Pilot_28	KRAS	G12S	12	25398285	C	T	c.34G>A	Cancer	-2.14	1472	64	0	98.4375	1.5625	0	Yes
CCK-81_ENU_Pilot_7	KRAS	G13D	12	25398281	C	T	c.38G>A	Cancer	-2.66	3926	67	0	100	0	0	Yes
NCI-H508_ENU_Flat_5	KRAS	G12C	12	25398285	C	A	c.34G>T	Cancer	-2.37	3574	57	0	100	0	0	Yes
NCI-H508-ENU-Cetuximab-15	KRAS	G12C	12	25398285	C	A	c.34G>T	Cancer	-2.37	3574	57	0	100	0	0	Yes
NCI-H508-ENU-Cetuximab-3	KRAS	G12D	12	25398284	C	T	c.35G>A	Cancer	-2.32	10504	58	0	100	0	0	Yes
NCI-H508-ENU-Cetuximab-5	KRAS	G12V	12	25398284	C	A	c.35G>T	Cancer	-2.32	7007	58	0	100	0	0	Yes
NCI-H508-ENU-Cetuximab-7	KRAS	G12D	12	25398284	C	T	c.35G>A	Cancer	-2.32	10504	58	0	100	0	0	Yes
CCK-81_ENU_Pilot_5	MAP2K1	C121S	15	66729153	T	A	c.361T>A	Passenger	0.93	2	98	0	0	0	100	No
CCK-81_ENU_Pilot_9	MAP2K1	K57N	15	66727455	G	T	c.171G>T	Passenger	1.74	12	239	0	0	100	0	Yes
NCI-H508-ENU-Cetuximab-20	MAP2K1	F53L	15	66727443	T	A	c.159T>A	Passenger	1.8	2	76	0	0	0	100	No
NCI-H508-ENU-Cetuximab-35	MAP2K1	K57E	15	66727453	A	G	c.169A>G	Passenger	1.78	1	90	100	0	0	0	No
NCI-H508-ENU-Cetuximab-31	MAP2K2	C125S	19	4110584	A	T	c.373T>A	Passenger	0.93	0	311	100	0	0	0	No
CCK-81_ENU_Pilot_2	NRAS	G12V	1	115258747	C	A	c.35G>T	Cancer	-2.32	90	115	0	100	0	0	Yes
CCK-81_ENU_Pilot_4	NRAS	Q61L	1	115256529	T	A	c.182A>T	Cancer	-2.92	252	114	0	0	0	100	Yes
NCI-H508_ENU_Flat_13	NRAS	Q61K	1	115256530	G	T	c.181C>A	Cancer	-2.86	886	46	0	0	100	0	Yes
NCI-H508_ENU_Flat_3	NRAS	Q61K	1	115256530	G	T	c.181C>A	Cancer	-2.86	886	46	0	0	100	0	Yes
NCI-H508_ENU_Flat_6	NRAS	Q61K	1	115256530	G	T	c.181C>A	Cancer	-2.86	886	46	0	0	100	0	Yes
NCI-H508-ENU-Cetuximab-10	NRAS	Q61K	1	115256530	G	T	c.181C>A	Cancer	-2.86	886	46	0	0	100	0	Yes
NCI-H508-ENU-Cetuximab-2	NRAS	Q61K	1	115256530	G	T	c.181C>A	Cancer	-2.86	886	46	0	0	100	0	Yes
NCI-H508-ENU-Cetuximab-21	NRAS	Q61K	1	115256530	G	T	c.181C>A	Cancer	-2.86	886	46	0	0	100	0	Yes
NCI-H508-ENU-Cetuximab-32	NRAS	Q61L	1	115256529	T	A	c.182A>T	Cancer	-2.92	252	48	0	0	0	100	Yes
NCI-H508-ENU-Cetuximab-38	NRAS	Q61K	1	115256530	G	T	c.181C>A	Cancer	-2.86	886	46	0	0	100	0	Yes
NCI-H508-ENU-Cetuximab-4	NRAS	Q61K	1	115256530	G	T	c.181C>A	Cancer	-2.86	886	46	0	0	100	0	Yes
NCI-H508_ENU_Flat_25	RAF1	T260K	3	12645690	G	T	c.779C>A	Cancer	-0.78	0	14	0	0	100	0	No
NCI-H508-ENU-Cetuximab-30	Unknown
NCI-H508-ENU-Cetuximab-8	Unknown
NCI-H508-ENU-Cetuximab-9	Unknown
CCK-81_ENU_Pilot_12	Unknown
CCK-81_ENU_Pilot_29	Unknown
NCI-H508_ENU_Flat_1	Unknown
NCI-H508_ENU_Flat_19	Unknown
NCI-H508_ENU_Flat_21	Unknown
NCI-H508_ENU_Flat_27	Unknown
NCI-H508_ENU_Flat_8	Unknown
NCI-H508-ENU-Cetuximab-1	Unknown
NCI-H508-ENU-Cetuximab-11	Unknown
NCI-H508-ENU-Cetuximab-13	Unknown
NCI-H508-ENU-Cetuximab-14	Unknown
NCI-H508-ENU-Cetuximab-16	Unknown
NCI-H508-ENU-Cetuximab-18	Unknown
NCI-H508-ENU-Cetuximab-19	Unknown
NCI-H508-ENU-Cetuximab-23	Unknown
NCI-H508-ENU-Cetuximab-25	Unknown
NCI-H508-ENU-Cetuximab-27	Unknown
NCI-H508-ENU-Cetuximab-28	Unknown
NCI-H508-ENU-Cetuximab-29	Unknown
NCI-H508-ENU-Cetuximab-33	Unknown
NCI-H508-ENU-Cetuximab-34	Unknown
NCI-H508-ENU-Cetuximab-36	Unknown
NCI-H508-ENU-Cetuximab-37	Unknown
NCI-H508-ENU-Cetuximab-39	Unknown
NCI-H508-ENU-Cetuximab-40	Unknown
NCI-H508-ENU-Cetuximab-41	Unknown
NCI-H508-ENU-Cetuximab-6	Unknown
