# Supplementary material for: Genome-wide chemical mutagenesis screens allow unbiased saturation of the cancer genome and identification of drug resistance mutations
Source: Genome Res. 2017 Apr;27(4):613–25. doi: 10.1101/gr.213546.116 (PMC5378179; doi:10.1101/gr.213546.116)
Supplement: Supplemental Material [file supp_gr.213546.116_Supplemental_Table_S5.xlsx]

## Sheet: Supp_Table_S5
gene_name	n_syn	n_mis	n_non	n_spl	n_ind	wmis3	wnon3	wspl3	wind	pmis3	ptrunc3	pallsubs3	pind	pglobal	qglobal	known	qglobal_sfdr	qmis_sfdr
NRAS	0	7	0	0	0	58.6678	0	0	0	2.68069e-10	0.872574	2.12938e-09	1	4.46476e-08	0.00089697	TRUE	2.49133e-05	1.49583e-07
KRAS	0	6	0	0	0	59.8261	0	0	0	3.69068e-09	0.876936	2.75271e-08	1	5.06721e-07	0.00509001	TRUE	0.000141375	1.0297e-06
MAP2K1	0	5	0	0	0	18.5049	0	0	0	2.11591e-05	0.800708	0.000113324	1	0.0011429	1	TRUE	0.21258	0.0039356
BRAF	1	5	0	0	0	10.0566	0	0	0	0.000364045	0.709094	0.00158506	1	0.0118041	1	TRUE	0.999929	0.0507842
PER1	0	6	0	0	1	7.24619	0	0	6.65706	0.000674949	0.704017	0.00279472	0.136807	0.00339103	1	TRUE	0.378438	0.0753243
consider significant any gene with qmis_sfdr<0.05 OR qglobal_sfdr<0.05
