# Supplementary material for: Genome-wide chemical mutagenesis screens allow unbiased saturation of the cancer genome and identification of drug resistance mutations
Source: Genome Res. 2017 Apr;27(4):613–25. doi: 10.1101/gr.213546.116 (PMC5378179; doi:10.1101/gr.213546.116)
Supplement: Supplemental Material [file supp_gr.213546.116_Supplemental_Table_S7.xlsx]

## Sheet: Supp Table S7
COSMIC id	Gene	Mutation
COSM33765	AKT1	c.49G>A | p.E17K
COSM28056	ALK	c.3824G>A | p.R1275Q
COSM28060	ALK	c.3824G>T | p.R1275L
COSM28062	ALK	c.3735C>G | p.F1245L
COSM28493	ALK	c.3735C>A | p.F1245L
COSM28500	ALK	c.3734T>G | p.F1245C
COSM28492	ALK	c.3733T>A | p.F1245I
COSM28499	ALK	c.3733T>G | p.F1245V
COSM1169447	ALK	c.3587T>A | p.L1196Q
COSM99137	ALK	c.3586C>A | p.L1196M
COSM4381101	ALK	c.3538G>C | p.V1180L
COSM28055	ALK	c.3522C>A | p.F1174L
COSM28061	ALK	c.3522C>G | p.F1174L
COSM28059	ALK	c.3521T>G | p.F1174C
COSM53063	ALK	c.3521T>C | p.F1174S
COSM28054	ALK	c.3520T>G | p.F1174V
COSM28057	ALK	c.3520T>C | p.F1174L
COSM28491	ALK	c.3520T>A | p.F1174I
COSM1169448	ALK	c.3512_3513TC>AT | p.I1171N
COSM28498	ALK	c.3512T>A | p.I1171N
COSM4381100	ALK	c.3512T>C | p.I1171T
COSM99136	ALK	c.3467G>A | p.C1156Y
COSM97185	ALK	c.3455T>G | p.L1152R
COSM1407659	ALK	c.3455T>C | p.L1152P
COSM144252	ALK	c.3453_3454insACG | p.T1151_L1152insT
COSM98475	ALK	c.3383G>C | p.G1128A
COSM150793	AR	c.2440T>G | p.F814V
COSM236693	AR	c.2632A>G | p.T878A
COSM1132	BRAF	c.1803A>C | p.K601N
COSM6265	BRAF	c.1803A>T | p.K601N
COSM26491	BRAF	c.1802A>T | p.K601I
COSM3878760	BRAF	c.1802A>C | p.K601T
COSM478	BRAF	c.1801A>G | p.K601E
COSM1133	BRAF	c.1799_1801delTGA | p.V600_K601>E
COSM475	BRAF	c.1799_1800TG>AA | p.V600E
COSM477	BRAF	c.1799_1800TG>AT | p.V600D
COSM308550	BRAF	c.1799_1800TG>AC | p.V600D
COSM473	BRAF	c.1798_1799GT>AA | p.V600K
COSM474	BRAF	c.1798_1799GT>AG | p.V600R
COSM476	BRAF	c.1799T>A | p.V600E
COSM1127	BRAF	c.1797_1799AGT>GAG | p.V600R
COSM6137	BRAF	c.1799T>G | p.V600G
COSM18443	BRAF	c.1799T>C | p.V600A
COSM249889	BRAF	c.1798_1799GT>CA | p.V600Q
COSM1583011	BRAF	c.1798_1799GT>CG | p.V600R
COSM1735763	BRAF	c.1796_1799CAGT>TAAA | p.T599_V600>IK
COSM1130	BRAF	c.1798G>A | p.V600M
COSM33808	BRAF	c.1798G>T | p.V600L
COSM219798	BRAF	c.1798G>C | p.V600L
COSM26504	BRAF	c.1798_1799ins18 | p.T599_V600insDFGLAT
COSM471	BRAF	c.1790T>G | p.L597R
COSM1125	BRAF	c.1790T>A | p.L597Q
COSM1126	BRAF	c.1789_1790CT>TC | p.L597S
COSM1448593	BRAF	c.1790T>C | p.L597P
COSM470	BRAF	c.1789C>G | p.L597V
COSM1121	BRAF	c.1782T>A | p.D594E
COSM253330	BRAF	c.1782T>G | p.D594E
COSM466	BRAF	c.1781A>T | p.D594V
COSM467	BRAF	c.1781A>G | p.D594G
COSM1583010	BRAF	c.1781A>C | p.D594A
COSM27639	BRAF	c.1780G>A | p.D594N
COSM144576	BRAF	c.1780G>C | p.D594H
COSM211600	BRAF	c.1779_1780TG>GA | p.D594N
COSM1113	BRAF	c.1405_1407GGA>AGC | p.G469S
COSM27912	BRAF	c.1405_1407GGA>AGT | p.G469S
COSM458	BRAF	c.1405_1406GG>TC | p.G469S
COSM459	BRAF	c.1406G>T | p.G469V
COSM460	BRAF	c.1406G>C | p.G469A
COSM461	BRAF	c.1406G>A | p.G469E
COSM1548505	BRAF	c.1405GG>TT | p.G469L
COSM455	BRAF	c.1405G>C | p.G469R
COSM457	BRAF	c.1405G>A | p.G469R
COSM451	BRAF	c.1397G>T | p.G466V
COSM452	BRAF	c.1397G>C | p.G466A
COSM453	BRAF	c.1397G>A | p.G466E
COSM1112	BRAF	c.1396G>C | p.G466R
COSM253328	BRAF	c.1396G>A | p.G466R
COSM363684	CDK4	c.71G>T | p.R24L
COSM1989836	CDK4	c.71G>A | p.R24H
COSM1677139	CDK4	c.70C>T | p.R24C
COSM3463914	CDK4	c.70C>A | p.R24S
COSM232013	CDK4	c.65A>G | p.K22R
COSM3463915	CDK4	c.65A>T | p.K22M
OM3153	CDK4	c.65A>C | p.K22T
COSM5661	CTNNB1	c.94G>T | p.D32Y
COSM5668	CTNNB1	c.94G>C | p.D32H
COSM5672	CTNNB1	c.94G>A | p.D32N
COSM5681	CTNNB1	c.95A>G | p.D32G
COSM5690	CTNNB1	c.95A>C | p.D32A
COSM5691	CTNNB1	c.95A>T | p.D32V
COSM5766	CTNNB1	c.96C>A | p.D32E
COSM22939	CTNNB1	c.96C>G | p.D32E
COSM5682	CTNNB1	c.97T>C | p.S33P
COSM5683	CTNNB1	c.97T>G | p.S33A
COSM6098	CTNNB1	c.97_98TC>CT | p.S33L
COSM6099	CTNNB1	c.97_98TC>AA | p.S33N
COSM27311	CTNNB1	c.97T>A | p.S33T
COSM5669	CTNNB1	c.98C>T | p.S33F
COSM5673	CTNNB1	c.98C>A | p.S33Y
COSM5677	CTNNB1	c.98C>G | p.S33C
COSM5684	CTNNB1	c.100G>C | p.G34R
COSM5686	CTNNB1	c.100G>A | p.G34R
COSM1666841	CTNNB1	c.100_101GG>AT | p.G34I
COSM5670	CTNNB1	c.101G>T | p.G34V
COSM5671	CTNNB1	c.101G>A | p.G34E
COSM1566774	CTNNB1	c.103A>G | p.I35V
COSM5674	CTNNB1	c.104T>G | p.I35S
COSM5695	CTNNB1	c.104T>A | p.I35N
COSM13168	CTNNB1	c.104T>C | p.I35T
COSM28727	CTNNB1	c.104_105TC>AA | p.I35K
COSM28711	CTNNB1	c.105C>G | p.I35M
COSM5703	CTNNB1	c.106C>T | p.H36Y
COSM5678	CTNNB1	c.107A>C | p.H36P
COSM27378	CTNNB1	c.107A>G | p.H36R
COSM5675	CTNNB1	c.109T>G | p.S37A
COSM5687	CTNNB1	c.109T>C | p.S37P
COSM5729	CTNNB1	c.109T>A | p.S37T
COSM5662	CTNNB1	c.110C>T | p.S37F
COSM5666	CTNNB1	c.110C>A | p.S37Y
COSM5679	CTNNB1	c.110C>G | p.S37C
COSM5664	CTNNB1	c.121A>G | p.T41A
COSM5688	CTNNB1	c.121A>C | p.T41P
COSM5716	CTNNB1	c.121A>T | p.T41S
COSM5676	CTNNB1	c.122C>T | p.T41I
COSM5701	CTNNB1	c.122C>G | p.T41S
COSM5730	CTNNB1	c.122C>A | p.T41N
COSM1617582	CTNNB1	c.132_140delTTCTCTGAG | p.S45_S47delSLS
COSM5663	CTNNB1	c.133T>C | p.S45P
COSM5685	CTNNB1	c.133T>G | p.S45A
COSM5719	CTNNB1	c.133T>A | p.S45T
COSM86011	CTNNB1	c.133_136TCTC>GAGT | p.S45E
COSM6128	CTNNB1	c.133_135delTCT | p.S45del
COSM6129	CTNNB1	c.133_138delTCTCTG | p.S45_L46del
COSM5667	CTNNB1	c.134C>T | p.S45F
COSM5689	CTNNB1	c.134C>G | p.S45C
COSM5692	CTNNB1	c.134C>A | p.S45Y
COSM6131	CTNNB1	c.134_136delCTC | p.S45del
COSM28708	CTNNB1	c.134_139delCTCTGA | p.S45_S47>C
COSM6132	CTNNB1	c.136_141delCTGAGT | p.L46_S47del
COSM4024594	DDR2	c.370C>T | p.R124W
COSM400880	DDR2	c.371G>T | p.R124L
COSM236671	EGFR	c.1474A>C | p.S492R
COSM236670	EGFR	c.1476C>A | p.S492R
COSM21690	EGFR	c.1793G>T | p.G598V
COSM3412196	EGFR	c.1793G>C | p.G598A
COSM12428	EGFR	c.2125_2127GAA>CAT | p.E709H
COSM12988	EGFR	c.2125G>A | p.E709K
COSM116882	EGFR	c.2125G>C | p.E709Q
COSM12371	EGFR	c.2126A>T | p.E709V
COSM13009	EGFR	c.2126A>G | p.E709G
COSM13427	EGFR	c.2126A>C | p.E709A
COSM18441	EGFR	c.2154_2155GG>TT | p.G719C
COSM6252	EGFR	c.2155G>A | p.G719S
COSM6253	EGFR	c.2155G>T | p.G719C
COSM6239	EGFR	c.2156G>C | p.G719A
COSM18425	EGFR	c.2156G>A | p.G719D
COSM85798	EGFR	c.2230_2249>GTCAA | p.I744_A750>VK
COSM133186	EGFR	c.2230_2247>CTTAAGAGA | p.I744_E749>LKR
COSM12423	EGFR	c.2231_2232ins18 | p.K745_E746insIPVAIK
COSM221565	EGFR	c.2232_2249del18 | p.K745_A750delKELREA
COSM3734668	EGFR	c.2232_2249>AAA | p.E746_A750del
COSM26038	EGFR	c.2233_2247del15 | p.K745_E749delKELRE
COSM18420	EGFR	c.2234_2236delAGG | p.E746delE
COSM1190791	EGFR	c.2234_2248del15 | p.K745_A750>T
COSM51504	EGFR	c.2234_2235ins18 | p.K745_E746insIPVAIK
COSM255152	EGFR	c.2234_2235ins18 | p.K745_E746insTPVAIK
COSM6223	EGFR	c.2235_2249del15 | p.E746_A750delELREA
COSM24869	EGFR	c.2235_2252del18 | p.E746_T751delELREAT
COSM28517	EGFR	c.2235_2246del12 | p.E746_E749delELRE
COSM12385	EGFR	c.2235_2255>AAT | p.E746_S752>I
COSM13549	EGFR	c.2235_2251>AG | p.E746_T751>A
COSM13550	EGFR	c.2235_2248>AATTC | p.E746_A750>IP
COSM13551	EGFR	c.2235_2252>AAT | p.E746_T751>I
COSM13552	EGFR	c.2235_2251>AATTC | p.E746_T751>IP
COSM6225	EGFR	c.2236_2250del15 | p.E746_A750delELREA
COSM12728	EGFR	c.2236_2253del18 | p.E746_T751delELREAT
COSM133189	EGFR	c.2236_2256del21 | p.E746_S752delELREATS
COSM12413	EGFR	c.2236_2248>AGAC | p.E746_A750>RP
COSM13200	EGFR	c.2236_2257>CTCT | p.E746_P753>LS
COSM13557	EGFR	c.2236_2248>CAAC | p.E746_A750>QP
COSM22999	EGFR	c.2236_2253>CAA | p.E746_T751>Q
COSM26513	EGFR	c.2236_2251>T | p.E746_T751>S
COSM26680	EGFR	c.2236_2252>AT | p.E746_T751>I
COSM51526	EGFR	c.2236_2253>ATTCCT | p.E746_T751>IP
COSM133187	EGFR	c.2236_2253>CTA | p.E746_T751>L
COSM133188	EGFR	c.2236_2255>AT | p.E746_S752>I
COSM133190	EGFR	c.2236_2256>ATC | p.E746_S752>I
COSM133191	EGFR	c.2236_2259>ATCTCG | p.E746_P753>IS
COSM26444	EGFR	c.2236_2237ins18 | p.K745_E746insVPVAIK
COSM12367	EGFR	c.2237_2254del18 | p.E746_S752>A
COSM12678	EGFR	c.2237_2251del15 | p.E746_T751>A
COSM12384	EGFR	c.2237_2255>T | p.E746_S752>V
COSM12386	EGFR	c.2237_2252>T | p.E746_T751>V
COSM12416	EGFR	c.2237_2253>TTGCT | p.E746_T751>VA
COSM18421	EGFR	c.2237_2251>TTC | p.E746_T751>VP
COSM18426	EGFR	c.2237_2256>TC | p.E746_S752>V
COSM18427	EGFR	c.2237_2257>TCT | p.E746_P753>VS
COSM28623	EGFR	c.2237_2250>TCCCT | p.E746_A750>VP
COSM51524	EGFR	c.2237_2258>TTCA | p.E746_P753>VQ
COSM52935	EGFR	c.2237_2253>TTCCT | p.E746_T751>VP
COSM53205	EGFR	c.2237_2251>TGG | p.E746_T751>VA
COSM133193	EGFR	c.2237_2253>TC | p.E746_T751>V
COSM144207	EGFR	c.2237_2248>CAC | p.E746_A750>AP
COSM674057	EGFR	c.2237_2256>TG | p.E746_S752>V
COSM6220	EGFR	c.2238_2255del18 | p.E746_S752>D
COSM255211	EGFR	c.2238_2258del21 | p.L747_P753delLREATSP
COSM12419	EGFR	c.2238_2252>GCA | p.L747_T751>Q
COSM12421	EGFR	c.2238_2255>GCAACA | p.L747_S752>QH
COSM12422	EGFR	c.2238_2248>GC | p.L747_A750>P
COSM18428	EGFR	c.2238_2249>TCC | p.E746_A750>DP
COSM22944	EGFR	c.2238_2251>GC | p.L747_T751>P
COSM26441	EGFR	c.2238_2256>GCAA | p.L747_S752>Q
COSM6218	EGFR	c.2239_2247delTTAAGAGAA | p.L747_E749delLRE
COSM6255	EGFR	c.2239_2256del18 | p.L747_S752delLREATS
COSM24970	EGFR	c.2239_2262del24 | p.L747_K754delLREATSPK
COSM12382	EGFR	c.2239_2248TTAAGAGAAG>C | p.L747_A750>P
COSM12383	EGFR	c.2239_2251>C | p.L747_T751>P
COSM12387	EGFR	c.2239_2258>CA | p.L747_P753>Q
COSM12403	EGFR	c.2239_2256>CAA | p.L747_S752>Q
COSM12420	EGFR	c.2239_2252>CA | p.L747_T751>Q
COSM23572	EGFR	c.2239_2253>GCT | p.L747_T751>A
COSM85891	EGFR	c.2239_2264>GCCAA | p.L747_A755>AN
COSM133196	EGFR	c.2239_2256>CAACAT | p.L747_S752>QH
COSM1235296	EGFR	c.2239_2253>CCAACG | p.L747_T751>PT
COSM1667023	EGFR	c.2239_2262>GCCAACAAGGGA | p.L747_K754>ANKG
COSM4170220	EGFR	c.2239_2250>CCG | p.L747_A750>P
COSM6210	EGFR	c.2240_2251del12 | p.L747_T751>S
COSM12369	EGFR	c.2240_2254del15 | p.L747_T751delLREAT
COSM12370	EGFR	c.2240_2257del18 | p.L747_P753>S
COSM4170221	EGFR	c.2240_2248del9 | p.L747_A750>S
COSM20883	EGFR	c.2240_2261>CGAC | p.L747_K754>ST
COSM1667026	EGFR	c.2240_2264>CGAAAGG | p.L747_A755>SKG
COSM26718	EGFR	c.2246_2260del15 | p.A750_K754del
COSM133207	EGFR	c.2252_2275del24 | p.T751_E758delTSPKANKE
COSM13556	EGFR	c.2253_2276del24 | p.S752_I759delSPKANKEI
COSM24269	EGFR	c.2257_2277del21 | p.P753_I759delPKANKEI
COSM26720	EGFR	c.2290_2291ins12 | p.A763_Y764insFQEA
COSM13559	EGFR	c.2298_2299insGCCATA | p.A767_S768insIA
COSM1235344	EGFR	c.2301_2302ins9 | p.A767_S768insSVG
COSM1651740	EGFR	c.2301_2302ins9 | p.A767_S768insYVM
COSM6241	EGFR	c.2303G>T | p.S768I
COSM12989	EGFR	c.2303G>A | p.S768N
COSM85750	EGFR	c.2303_2305GCG>TCT | p.S768_V769>IL
COSM291998	EGFR	c.2303G>C | p.S768T
COSM12425	EGFR	c.2302_2303insCGCTGGCCA | p.A767_S768insTLA
COSM20884	EGFR	c.2303_2304insTGTGGCCAG | p.V769_D770insASV
COSM1651741	EGFR	c.2303_2304ins9 | p.V769_D770insANV
COSM12376	EGFR	c.2307_2308insGCCAGCGTG | p.V769_D770insASV
COSM12379	EGFR	c.2307_2308insTGCGTG | p.V769_D770insCV
COSM20885	EGFR	c.2307_2308insGACAACGTG | p.N771_P772insVDN
COSM28638	EGFR	c.2307_2308ins15 | p.V769_D770insMASVD
COSM12427	EGFR	c.2308_2309insGTT | p.D770>GY
COSM18429	EGFR	c.2308_2309insGCAGCGTGG | p.V769_D770insGSV
COSM18430	EGFR	c.2308_2309insGGGTCGTGG | p.V769_D770insGVV
COSM22955	EGFR	c.2308_2309insACGGCG | p.D770_N771insGD
COSM1651742	EGFR	c.2308_2309ins9 | p.V769_D770insERG
COSM12737	EGFR	c.2309_2312ACAA>CTGGTGG | p.D770_N771>AGG
COSM13558	EGFR	c.2309_2310AC>CCAGCGTGGAT | p.V769_D770insASV
COSM12378	EGFR	c.2310_2311insGGT | p.D770_N771insG
COSM13003	EGFR	c.2310_2311insAAC | p.N771_P772insN
COSM13004	EGFR	c.2310_2311insGGC | p.D770_N771insG
COSM20886	EGFR	c.2310_2311insGCACCGTGG | p.D770_N771insAPW
COSM48921	EGFR	c.2310_2311insGGGTTA | p.D770_N771insGL
COSM85795	EGFR	c.2310_2311insGGGGAC | p.D770_N771insGD
COSM655155	EGFR	c.2310_2311insGGGTTT | p.D770_N771insGF
COSM1238029	EGFR	c.2310_2311insGGCACA | p.D770_N771insGT
COSM1238030	EGFR	c.2310_2311insTAC | p.D770_N771insY
COSM18431	EGFR	c.2311_2312AA>GGGTT | p.N771>GF
COSM53189	EGFR	c.2311A>GGTT | p.N771>GY
COSM13428	EGFR	c.2311_2312insGCGTGGACA | p.D770_N771insSVD
COSM22946	EGFR	c.2311_2312insCAC | p.N771>TH
COSM24434	EGFR	c.2311_2312insGTC | p.N771>SH
COSM26719	EGFR	c.2311_2312ins12 | p.D770_N771insMATP
COSM166390	EGFR	c.2311_2312insACCGGC | p.N771_P772insRH
COSM1651743	EGFR	c.2311_2312ins9 | p.D770_N771insSVE
COSM1651744	EGFR	c.2311_2312insGTGGCC | p.N771>SGH
COSM13554	EGFR	c.2312_2315ACCC>13 | p.N771_P772>SVDNR
COSM1238031	EGFR	c.2314_2315insACC | p.N771_P772insH
COSM48923	EGFR	c.2315_2316insGACACACCC | p.P772_H773insTHP
COSM12388	EGFR	c.2316C>AACCCCT | p.P772_H773insTP
COSM255205	EGFR	c.2316_2317insGTT | p.P772_H773insV
COSM1651745	EGFR	c.2316_2317ins9 | p.P772_H773insDNP
COSM1735761	EGFR	c.2317_2318ins9 | p.H773>PNPY
COSM3727813	EGFR	c.2318_2319ins12 | p.H773_V774insTQPP
COSM12377	EGFR	c.2319_2320insCAC | p.H773_V774insH
COSM12380	EGFR	c.2319_2320insCCCCAC | p.H773_V774insPH
COSM12381	EGFR	c.2319_2320insAACCCCCAC | p.H773_V774insNPH
COSM131552	EGFR	c.2319_2320insCAG | p.H773_V774insQ
COSM51544	EGFR	c.2320_2321ins12 | p.H773_V774insGNPH
COSM1238028	EGFR	c.2320_2321insCCCACG | p.H773_V774insAH
COSM18432	EGFR	c.2321_2322insCCACGT | p.V774_C775insHV
COSM22948	EGFR	c.2322_2323insCACGTG | p.V774_C775insHV
COSM4170223	EGFR	c.2322_2323insCCACGT | p.V774_C775insPR
COSM1272071	EGFR	c.2368A>G | p.T790A
COSM6240	EGFR	c.2369C>T | p.T790M
COSM12366	EGFR	c.2572C>A | p.L858M
COSM13553	EGFR	c.2572_2573CT>AG | p.L858R
COSM24268	EGFR	c.2572_2573CT>AA | p.L858K
COSM6224	EGFR	c.2573T>G | p.L858R
COSM12429	EGFR	c.2573_2574TG>GT | p.L858R
COSM29578	EGFR	c.2573T>A | p.L858Q
COSM133630	EGFR	c.2573_2574TG>GA | p.L858R
COSM24848	EGFR	c.2581C>G | p.L861V
COSM6213	EGFR	c.2582T>A | p.L861Q
COSM12374	EGFR	c.2582T>G | p.L861R
COSM48358	ERBB2	c.929C>T | p.S310F
COSM94225	ERBB2	c.929C>A | p.S310Y
COSM436498	ERBB2	c.2033G>A | p.R678Q
COSM14059	ERBB2	c.2198C>T | p.T733I
COSM683	ERBB2	c.2263_2264TT>CC | p.L755P
COSM1205571	ERBB2	c.2263T>A | p.L755M
COSM14060	ERBB2	c.2264T>C | p.L755S
COSM436499	ERBB2	c.2264T>G | p.L755W
COSM13170	ERBB2	c.2305G>C | p.D769H
COSM1251412	ERBB2	c.2305G>T | p.D769Y
COSM1302747	ERBB2	c.2305G>A | p.D769N
COSM20959	ERBB2	c.2324_2325ins12 | p.A775_G776insYVMA
COSM685	ERBB2	c.2326G>A | p.G776S
COSM303938	ERBB2	c.2326G>T | p.G776C
COSM12558	ERBB2	c.2325_2326ins12 | p.A775_G776insYVMA
COSM12554	ERBB2	c.2326G>CTTT | p.G776>LC
COSM19875	ERBB2	c.2326G>TTGT | p.G776>LC
COSM20895	ERBB2	c.2326G>TTAT | p.G776>LC
COSM18609	ERBB2	c.2327G>T | p.G776V
COSM12552	ERBB2	c.2326_2327insTTT | p.G776>VC
COSM12553	ERBB2	c.2326_2327insTGT | p.G776>VC
COSM85995	ERBB2	c.2326_2327insTCT | p.G776>VC
COSM14062	ERBB2	c.2329G>T | p.V777L
COSM14064	ERBB2	c.2329G>A | p.V777M
COSM436500	ERBB2	c.2329G>C | p.V777L
COSM303939	ERBB2	c.2331_2332insTGTGGG | p.V777_G778insCG
COSM26681	ERBB2	c.2333_2334insGGG | p.G778_S779insG
COSM681	ERBB2	c.2335_2336insCTGTGGGCT | p.S779_P780insVGS
COSM12555	ERBB2	c.2339_2340insGGGCTCCCC | p.P780_Y781insGSP
COSM303948	ERBB2	c.2339_2340insTGGCTCCCC | p.P780_Y781insGSP
COSM12556	ERBB2	c.2340_2341insGGCTCCCCA | p.P780_Y781insGSP
COSM14065	ERBB2	c.2524G>A | p.V842I
COSM14066	ERBB2	c.2686C>T | p.R896C
COSM119971	ERBB2	c.2687G>A | p.R896H
COSM52974	ERBB2	c.546_547CC>TT | p.R183C
COSM21651	ERBB2	c.547C>T | p.R183C
COSM52973	ERBB2	c.548G>A | p.R183H
COSM1606366	ERBB3	c.178A>T | p.M60L
COSM254678	ERBB3	c.179T>A | p.M60K
COSM941484	ERBB3	c.179T>G | p.M60R
COSM122890	ERBB3	c.273G>A | p.M91I
COSM1299636	ERBB3	c.273G>C | p.M91I
COSM160824	ERBB3	c.310G>C | p.V104L
COSM172423	ERBB3	c.310G>A | p.V104M
COSM191840	ERBB3	c.310G>T | p.V104L
COSM4043440	ERBB3	c.694G>A | p.A232T
COSM1242239	ERBB3	c.695C>T | p.A232V
COSM160822	ERBB3	c.889G>T | p.D297Y
COSM941489	ERBB3	c.889G>A | p.D297N
COSM941490	ERBB3	c.890A>T | p.D297V
COSM254677	ERBB3	c.994G>A | p.E332K
COSM160827	ERBB4	c.2131C>T | p.R711C
COSM1074635	ESR1	c.1609T>A | p.Y537N
COSM1074637	ESR1	c.1610A>G | p.Y537C
COSM1074639	ESR1	c.1610A>C | p.Y537S
COSM94250	ESR1	c.1613A>G | p.D538G
COSM1451536	ESR1	c.322A>G | p.R108G
COSM21683	ESR1	c.323G>A | p.R108K
COSM21686	ESR1	c.865G>A | p.A289T
COSM21685	ESR1	c.866C>A | p.A289D
COSM21687	ESR1	c.866C>T | p.A289V
COSM49173	FGFR2	c.1977G>T | p.K659N
COSM683054	FGFR2	c.1977G>C | p.K659N
COSM49175	FGFR2	c.1976A>T | p.K659M
COSM36909	FGFR2	c.1975A>G | p.K659E
COSM36902	FGFR2	c.1647T>G | p.N549K
COSM36912	FGFR2	c.1647T>A | p.N549K
COSM3665553	FGFR2	c.1649A>G | p.N550S
COSM250083	FGFR2	c.1645A>C | p.N549H
COSM915493	FGFR2	c.878G>A | p.C293Y
COSM36906	FGFR2	c.1144T>C | p.C382R
COSM36904	FGFR2	c.1124A>G | p.Y375C
COSM49171	FGFR2	c.941C>A | p.A314D
COSM49170	FGFR2	c.758C>G | p.P253R
COSM537801	FGFR2	c.491C>T | p.P164L
COSM36903	FGFR2	c.755C>G | p.S252W
COSM1757310	FGFR3	c.743G>A | p.R248H
COSM29431	FGFR3	c.745T>A | p.S249T
COSM715	FGFR3	c.746C>G | p.S249C
COSM716	FGFR3	c.1108G>T | p.G370C
COSM17461	FGFR3	c.1111A>T | p.S371C
COSM718	FGFR3	c.1118A>G | p.Y373C
COSM24842	FGFR3	c.1138G>A | p.G380R
COSM51545	FGFR3	c.1139G>A | p.G380E
COSM721	FGFR3	c.1172C>A | p.A391E
COSM1737909	FGFR3	c.1172C>T | p.A391V
COSM719	FGFR3	c.1948A>G | p.K650E
COSM726	FGFR3	c.1948A>C | p.K650Q
COSM720	FGFR3	c.1949A>T | p.K650M
COSM731	FGFR3	c.1949A>C | p.K650T
COSM1428730	FGFR3	c.1950G>T | p.K650N
COSM3993567	FGFR3	c.1956G>C | p.K652N
COSM24802	FGFR3	c.2089G>T | p.G697C
COSM238583	GNA11	c.625C>A | p.Q209K
COSM52969	GNA11	c.626A>T | p.Q209L
COSM52970	GNA11	c.626A>C | p.Q209P
COSM52971	GNA11	c.626_627AG>TA | p.Q209L
COSM52972	GNA11	c.626_627AG>TT | p.Q209L
COSM1666996	GNA11	c.626A>G | p.Q209R
COSM1717778	GNA11	c.627G>T | p.Q209H
COSM28761	GNAQ	c.625_627CAA>TAT | p.Q209Y
COSM28770	GNAQ	c.627A>T | p.Q209H
COSM1666995	GNAQ	c.627A>C | p.Q209H
COSM28757	GNAQ	c.626A>T | p.Q209L
COSM28758	GNAQ	c.626A>C | p.Q209P
COSM28759	GNAQ	c.625_626CA>TT | p.Q209L
COSM28760	GNAQ	c.626A>G | p.Q209R
COSM132932	GNAQ	c.625C>A | p.Q209K
COSM52975	GNAQ	c.548G>A | p.R183Q
COSM501	HRAS	c.182_183AG>GT | p.Q61R
COSM502	HRAS	c.183G>T | p.Q61H
COSM503	HRAS	c.183G>C | p.Q61H
COSM33695	HRAS	c.182_183AG>GA | p.Q61R
COSM52978	HRAS	c.182_183AG>TA | p.Q61L
COSM498	HRAS	c.182A>T | p.Q61L
COSM499	HRAS	c.182A>G | p.Q61R
COSM500	HRAS	c.182A>C | p.Q61P
COSM52979	HRAS	c.181_182CA>AG | p.Q61R
COSM496	HRAS	c.181C>A | p.Q61K
COSM497	HRAS	c.181C>G | p.Q61E
COSM489	HRAS	c.38G>T | p.G13V
COSM490	HRAS	c.38G>A | p.G13D
COSM486	HRAS	c.37G>C | p.G13R
COSM487	HRAS	c.37G>A | p.G13S
COSM488	HRAS	c.37G>T | p.G13C
COSM483	HRAS	c.35G>T | p.G12V
COSM484	HRAS	c.35G>A | p.G12D
COSM485	HRAS	c.35G>C | p.G12A
COSM480	HRAS	c.34G>A | p.G12S
COSM481	HRAS	c.34G>T | p.G12C
COSM482	HRAS	c.34G>C | p.G12R
COSM86993	IDH1	c.395_396GT>AC | p.R132H
COSM28746	IDH1	c.395G>A | p.R132H
COSM28750	IDH1	c.395G>T | p.R132L
COSM28751	IDH1	c.394_395CG>GT | p.R132V
COSM1169216	IDH1	c.394_395CG>TC | p.R132S
COSM28747	IDH1	c.394C>T | p.R132C
COSM28748	IDH1	c.394C>A | p.R132S
COSM28749	IDH1	c.394C>G | p.R132G
COSM34090	IDH2	c.516G>T | p.R172S
COSM133672	IDH2	c.516G>C | p.R172S
COSM256046	IDH2	c.515_516GG>AT | p.R172N
COSM33732	IDH2	c.515G>T | p.R172M
COSM33733	IDH2	c.515G>A | p.R172K
COSM1636997	IDH2	c.515G>C | p.R172T
COSM33731	IDH2	c.514A>G | p.R172G
COSM34039	IDH2	c.514A>T | p.R172W
COSM41590	IDH2	c.419G>A | p.R140Q
COSM41875	IDH2	c.419G>T | p.R140L
COSM41877	IDH2	c.418C>T | p.R140W
COSM1737874	IDH2	c.418C>G | p.R140G
COSM41751	JAK1	c.2171G>A | p.R724H
COSM3741347	JAK1	c.2170C>T | p.R724C
COSM96541	JAK1	c.2108G>C | p.S703T
COSM305942	JAK1	c.2108G>T | p.S703I
COSM41757	JAK1	c.1972G>T | p.V658F
COSM25834	JAK2	c.1848_1849TG>CT | p.V617F
COSM12600	JAK2	c.1849G>T | p.V617F
COSM27624	JAK2	c.1849_1852GTCT>TTTC | p.V617_C618>FR
COSM29117	JAK2	c.1849G>A | p.V617I
COSM29821	JAK2	c.1849_1852GTCT>TTCC | p.V617_C618>FR
COSM35864	JAK3	c.1970G>A | p.R657Q
COSM20527	JAK3	c.1580T>C | p.L527P
COSM4075497	JAK3	c.1580T>G | p.L527R
COSM48455	JAK3	c.1477A>T | p.S493C
COSM711172	JAK3	c.1477A>C | p.S493R
COSM29014	KIT	c.1255_1257delGAC | p.D419del
COSM1578132	KIT	c.1255_1260delGACAGG | p.D419_R420del
COSM1152	KIT	c.1255_1261GACAGGC>T | p.D419_L421>F
COSM1578133	KIT	c.1255_1262GACAGGCT>CA | p.D419_L421>H
COSM1600400	KIT	c.1255_1258GACA>C | p.D419del
COSM36332	KIT	c.1257_1258insTTCCTC | p.D419_R420insFL
COSM36334	KIT	c.1257_1258insTTTTTC | p.D419_R420insFF
COSM53306	KIT	c.1507_1508insTTGCCT | p.A502_Y503insFA
COSM219786	KIT	c.1507_1508insCTGCCT | p.Y503_F504insSA
COSM1326	KIT	c.1509_1510insGCCTAT | p.Y503_F504insAY
COSM1160	KIT	c.1648_1653delAAACCC | p.K550_P551del
COSM1171	KIT	c.1651_1653delCCC | p.P551del
COSM1174	KIT	c.1652_1663del12 | p.P551_V555>L
COSM1176	KIT	c.1652_1654delCCA | p.P551_M552>L
COSM96881	KIT	c.1653_1658delCATGTA | p.M552_Y553del
COSM1179	KIT	c.1654_1659delATGTAT | p.M552_Y553del
COSM1181	KIT	c.1654_1662del9 | p.M552_E554del
COSM18827	KIT	c.1654_1665del12 | p.M552_V555del
COSM1185	KIT	c.1655_1663del9 | p.M552_V555>I
COSM36311	KIT	c.1655_1660delTGTATG | p.M552_E554>K
COSM96863	KIT	c.1655_1657delTGT | p.M552_Y553>N
COSM96868	KIT	c.1655_1666del12 | p.M552_Q556>K
COSM1189	KIT	c.1657_1668del12 | p.Y553_Q556del
COSM1192	KIT	c.1660_1674del15 | p.E554_K558del
COSM1198	KIT	c.1663_1677del15 | p.V555_V559del
COSM1199	KIT	c.1663_1674del12 | p.V555_K558del
COSM1201	KIT	c.1663_1668delGTACAG | p.V555_Q556del
COSM1204	KIT	c.1666_1680del15 | p.Q556_V560del
COSM1206	KIT	c.1666_1683del18 | p.Q556_E561del
COSM23418	KIT	c.?_?del? | p.Q556_K558del
COSM36309	KIT	c.1666_1671delCAGTGG | p.Q556_W557del
COSM36315	KIT	c.1666_1677del12 | p.Q556_V559del
COSM1207	KIT	c.1666_1678>T | p.Q556_V560>F
COSM27904	KIT	c.1666_1680>ACAACCTTC | p.Q556_V560>TTF
COSM133642	KIT	c.1667_1669delAGT | p.Q556_W557>R
COSM28993	KIT	c.1667_1673AGTGGAA>G | p.Q556_K558>R
COSM1213	KIT	c.1668_1679del12 | p.Q556_V560>H
COSM133641	KIT	c.1668_1676del9 | p.Q556_V559>H
COSM1214	KIT	c.1668_1677GTGGAAGGTT>TACT | p.Q556_V559>HT
COSM1216	KIT	c.1669T>A | p.W557R
COSM1219	KIT	c.1669T>C | p.W557R
COSM1221	KIT	c.1669T>G | p.W557G
COSM1217	KIT	c.1669_1674delTGGAAG | p.W557_K558del
COSM1218	KIT	c.1669_1677del9 | p.W557_V559del
COSM1220	KIT	c.1669_1671delTGG | p.W557del
COSM1223	KIT	c.1669_1680del12 | p.W557_V560del
COSM1332	KIT	c.1669_1683del15 | p.W557_E561del
COSM36312	KIT	c.1669_1686del18 | p.W557_E562del
COSM1222	KIT	c.1669_1675TGGAAGG>A | p.W557_V559>I
COSM24748	KIT	c.1669_1672TGGA>G | p.W557_K558>E
COSM1224	KIT	c.1670_1674GGAAG>TTCCT | p.W557_K558>FP
COSM1227	KIT	c.1670G>C | p.W557S
COSM96948	KIT	c.1670_1673GGAA>CTTC | p.W557_K558>SS
COSM1226	KIT	c.1670_1675delGGAAGG | p.W557_V559>F
COSM1230	KIT	c.1670_1678del9 | p.W557_V560>F
COSM19108	KIT	c.1671G>T | p.W557C
COSM21978	KIT	c.1671_1673GAA>TCC | p.W557_K558>CP
COSM28992	KIT	c.1671_1673GAA>CAC | p.W557_K558>CT
COSM133700	KIT	c.1671G>C | p.W557C
COSM1232	KIT	c.1671_1679del9 | p.W557_V560>C
COSM1233	KIT	c.1671_1676delGAAGGT | p.W557_V559>C
COSM96887	KIT	c.1671_1674GAAG>C | p.W557_K558>C
COSM28637	KIT	c.1672_1676AAGGT>TCTTC | p.K558_V559>SS
COSM1234	KIT	c.1672_1680del9 | p.K558_V560del
COSM1235	KIT	c.1672_1677delAAGGTT | p.K558_V559del
COSM1238	KIT	c.1672_1692del21 | p.K558_N564del
COSM1240	KIT	c.1673_1693del21 | p.K558_G565>R
COSM1241	KIT	c.1673_1678delAGGTTG | p.K558_V560>I
COSM18896	KIT	c.1673_1687del15 | p.K558_E562del
COSM1242	KIT	c.1673_1680AGGTTGTT>TG | p.K558_V560>M
COSM21976	KIT	c.1673_1674insTCC | p.K558>NP
COSM1244	KIT	c.1674_1676delGGT | p.K558_V559>N
COSM27069	KIT	c.1674_1679delGGTTGT | p.K558_V560>N
COSM1251	KIT	c.1675G>A | p.V559I
COSM96869	KIT	c.1675_1677GTT>AAG | p.V559K
COSM1272086	KIT	c.1675_1676GT>CC | p.V559P
COSM1247	KIT	c.1675_1677delGTT | p.V559del
COSM1248	KIT	c.1675_1680delGTTGTT | p.V559_V560del
COSM1249	KIT	c.1675_1695del21 | p.V559_G565del
COSM1250	KIT	c.1675_1683del9 | p.V559_E561del
COSM1252	KIT	c.1676T>A | p.V559D
COSM1253	KIT	c.1676T>G | p.V559G
COSM1255	KIT	c.1676T>C | p.V559A
COSM18897	KIT	c.1676_1687del12 | p.V559_E562del
COSM1257	KIT	c.1679T>A | p.V560D
COSM1260	KIT	c.1679T>G | p.V560G
COSM1333	KIT	c.1679_1680TT>AG | p.V560E
COSM36302	KIT	c.1679T>C | p.V560A
COSM1262	KIT	c.1680_1682delTGA | p.E561del
COSM1263	KIT	c.1681_1683delGAG | p.E561del
COSM1267	KIT	c.1686_1706del21 | p.E562_V569>D
COSM22376	KIT	c.1691_1717>CCT | p.N564_P573>TS
COSM1276	KIT	c.1699_1719del21 | p.N567_P573del
COSM1334	KIT	c.1702_1722del21 | p.Y568_T574del
COSM1279	KIT	c.1703_1726>GTG | p.Y568_L576>CV
COSM1281	KIT	c.1705_1725del21 | p.V569_Q575del
COSM1282	KIT	c.1705_1716del12 | p.V569_D572del
COSM1283	KIT	c.1706_1727>G | p.V569_L576>G
COSM1285	KIT	c.1708_1728del21 | p.Y570_L576del
COSM133754	KIT	c.1711_1728del18 | p.I571_L576del
COSM96875	KIT	c.1723_1725delCAA | p.Q575del
COSM96865	KIT	c.1723_1729CAACTTC>A | p.Q575_P577>T
COSM219110	KIT	c.1723_1731CAACTTCCT>ACA | p.Q575_P577>T
COSM33966	KIT	c.1726C>T | p.L576F
COSM1289	KIT	c.1726_1728delCTT | p.L576del
COSM1290	KIT	c.1727T>C | p.L576P
COSM1292	KIT	c.1728_1729insCAACTT | p.L576_P577insQL
COSM1291	KIT	c.1729_1734delCCTTAT | p.P577_Y578del
COSM1684822	KIT	c.1729_1731delCCT | p.P577del
COSM98379	KIT	c.1730_1738del9 | p.P577_D579del
COSM1294	KIT	c.1735_1737delGAT | p.D579del
COSM1295	KIT	c.1737_1739delTCA | p.H580del
COSM96866	KIT	c.1737_1738ins9 | p.D579_H580insSYD
COSM1304	KIT	c.1924A>G | p.K642E
COSM96871	KIT	c.1924A>C | p.K642Q
COSM4125155	KIT	c.1926A>C | p.K642N
COSM12706	KIT	c.1961T>C | p.V654A
COSM51381	KIT	c.2386A>G | p.R796G
COSM1272091	KIT	c.2386_2387AG>GC | p.R796A
COSM1272092	KIT	c.2386_2387AG>CC | p.R796P
COSM1600411	KIT	c.2387G>A | p.R796K
COSM1310	KIT	c.2446G>T | p.D816Y
COSM1311	KIT	c.2446G>C | p.D816H
COSM1312	KIT	c.2446_2447GA>TT | p.D816F
COSM1313	KIT	c.2446G>A | p.D816N
COSM21979	KIT	c.2446_2447GA>AT | p.D816I
COSM1600404	KIT	c.2446_2448GAC>CAT | p.D816H
COSM1314	KIT	c.2447A>T | p.D816V
COSM12711	KIT	c.2447A>G | p.D816G
COSM24675	KIT	c.2447A>C | p.D816A
COSM19285	KIT	c.2448C>G | p.D816E
COSM12710	KIT	c.2458G>T | p.D820Y
COSM17947	KIT	c.2458G>A | p.D820N
COSM22379	KIT	c.2458G>C | p.D820H
COSM1316	KIT	c.2459A>G | p.D820G
COSM1317	KIT	c.2459A>T | p.D820V
COSM133670	KIT	c.2459A>C | p.D820A
COSM12709	KIT	c.2460T>A | p.D820E
COSM19280	KIT	c.2460T>G | p.D820E
COSM1318	KIT	c.2464A>C | p.N822H
COSM19109	KIT	c.2464A>T | p.N822Y
COSM33975	KIT	c.2465A>G | p.N822S
COSM3604523	KIT	c.2465A>T | p.N822I
COSM1321	KIT	c.2466T>A | p.N822K
COSM1322	KIT	c.2466T>G | p.N822K
COSM19110	KIT	c.2473G>A | p.V825I
COSM1323	KIT	c.2474T>C | p.V825A
COSM19900	KRAS	c.437C>T | p.A146V
COSM19404	KRAS	c.436G>A | p.A146T
COSM19905	KRAS	c.436G>C | p.A146P
COSM19940	KRAS	c.351A>C | p.K117N
COSM28519	KRAS	c.351A>T | p.K117N
COSM554	KRAS	c.183A>C | p.Q61H
COSM555	KRAS	c.183A>T | p.Q61H
COSM1168052	KRAS	c.182_183AA>GT | p.Q61R
COSM551	KRAS	c.182A>C | p.Q61P
COSM552	KRAS	c.182A>G | p.Q61R
COSM553	KRAS	c.182A>T | p.Q61L
COSM549	KRAS	c.181C>A | p.Q61K
COSM550	KRAS	c.181C>G | p.Q61E
COSM87298	KRAS	c.180_181TC>AA | p.Q61K
COSM547	KRAS	c.176C>A | p.A59E
COSM28518	KRAS	c.176C>G | p.A59G
COSM546	KRAS	c.175G>A | p.A59T
COSM1235389	KRAS	c.175G>T | p.A59S
COSM30568	KRAS	c.38_40GCG>ACA | p.G13_V14>DI
COSM526	KRAS	c.37_39GGC>CGT | p.G13R
COSM530	KRAS	c.38_39GC>TG | p.G13V
COSM531	KRAS	c.38_39GC>AT | p.G13D
COSM12721	KRAS	c.38_39GC>TT | p.G13V
COSM30567	KRAS	c.38_39GC>AG | p.G13E
COSM87280	KRAS	c.38_39GC>AA | p.G13E
COSM525	KRAS	c.37_38GG>AT | p.G13I
COSM532	KRAS	c.38G>A | p.G13D
COSM533	KRAS	c.38G>C | p.G13A
COSM534	KRAS	c.38G>T | p.G13V
COSM53283	KRAS	c.37_38GG>AA | p.G13N
COSM527	KRAS	c.37G>T | p.G13C
COSM528	KRAS	c.37G>A | p.G13S
COSM529	KRAS	c.37G>C | p.G13R
COSM87281	KRAS	c.36_37TG>AT | p.G13C
COSM513	KRAS	c.34_36GGT>TGC | p.G12C
COSM515	KRAS	c.35_36GT>TC | p.G12V
COSM519	KRAS	c.35_36GT>AA | p.G12E
COSM14209	KRAS	c.35_36GT>AC | p.G12D
COSM30566	KRAS	c.35_36GT>AG | p.G12E
COSM36281	KRAS	c.34_36GGT>TGG | p.G12W
COSM512	KRAS	c.34_35GG>TT | p.G12F
COSM514	KRAS	c.34_35GG>CT | p.G12L
COSM520	KRAS	c.35G>T | p.G12V
COSM521	KRAS	c.35G>A | p.G12D
COSM522	KRAS	c.35G>C | p.G12A
COSM13643	KRAS	c.34_35GG>AA | p.G12N
COSM25081	KRAS	c.34_35GG>TA | p.G12Y
COSM34144	KRAS	c.34_35GG>AT | p.G12I
COSM516	KRAS	c.34G>T | p.G12C
COSM517	KRAS	c.34G>A | p.G12S
COSM518	KRAS	c.34G>C | p.G12R
COSM555604	MAP2K1	c.157T>C | p.F53L
COSM3503329	MAP2K1	c.157T>A | p.F53I
COSM1725008	MAP2K1	c.159T>A | p.F53L
COSM1235478	MAP2K1	c.171G>T | p.K57N
COSM235614	MAP2K1	c.370C>T | p.P124S
COSM1167912	MAP2K1	c.371C>A | p.P124Q
COSM1315861	MAP2K1	c.371C>T | p.P124L
COSM232755	MAP2K1	c.607G>A | p.E203K
COSM3386991	MAP2K1	c.608A>T | p.E203V
COSM145610	MAP2K2	c.179A>C | p.Q60P
COSM3389034	MAP2K2	c.171T>A | p.F57L
COSM1235618	MAP2K2	c.169T>C | p.F57L
COSM3534171	MAP2K2	c.169T>G | p.F57V
COSM707	MET	c.3029C>T | p.T1010I
COSM48564	MET	c.3061T>A | p.Y1021N
COSM339515	MET	c.3062A>T | p.Y1021F
COSM24687	MET	c.3082+1G>T | p.?
COSM29633	MET	c.3082+1G>A | p.?
COSM696	MET	c.3334C>T | p.H1112Y
COSM698	MET	c.3335A>T | p.H1112L
COSM703	MET	c.3335A>G | p.H1112R
COSM690	MET	c.3742T>C | p.Y1248H
COSM699	MET	c.3743A>G | p.Y1248C
COSM700	MET	c.3757T>G | p.Y1253D
COSM691	MET	c.3803T>C | p.M1268T
COSM694	MET	c.3804G>A | p.M1268I
COSM1185313	MTOR	c.7280T>A | p.L2427Q
COSM20417	MTOR	c.6644C>A | p.S2215Y
COSM1686998	MTOR	c.6644C>T | p.S2215F
COSM249481	MTOR	c.6016G>T | p.V2006F
COSM893804	MTOR	c.6016G>A | p.V2006I
COSM1134662	MTOR	c.6016G>C | p.V2006L
COSM462601	MTOR	c.5930C>A | p.T1977K
COSM462602	MTOR	c.5930C>G | p.T1977R
COSM1289945	MTOR	c.5929A>T | p.T1977S
COSM462604	MTOR	c.5664C>G | p.F1888L
COSM893813	MTOR	c.5664C>A | p.F1888L
COSM893814	MTOR	c.5662T>G | p.F1888V
COSM3358967	MTOR	c.5662T>C | p.F1888L
COSM3358968	MTOR	c.5662T>A | p.F1888I
COSM180789	MTOR	c.5395G>A | p.E1799K
COSM462615	MTOR	c.4448G>A | p.C1483Y
COSM462616	MTOR	c.4448G>T | p.C1483F
COSM3747775	MTOR	c.4447T>C | p.C1483R
COSM4170228	NRAS	c.437C>T | p.A146V
COSM27174	NRAS	c.436G>A | p.A146T
COSM26494	NRAS	c.183_184AG>CA | p.Q61_E62>HK
COSM585	NRAS	c.183A>T | p.Q61H
COSM586	NRAS	c.183A>C | p.Q61H
COSM30646	NRAS	c.182_183AA>TG | p.Q61L
COSM33693	NRAS	c.182_183AA>GG | p.Q61R
COSM53223	NRAS	c.181_183CAA>AAG | p.Q61K
COSM579	NRAS	c.181_182CA>AG | p.Q61R
COSM582	NRAS	c.182A>C | p.Q61P
COSM583	NRAS	c.182A>T | p.Q61L
COSM584	NRAS	c.182A>G | p.Q61R
COSM12725	NRAS	c.181_182CA>TT | p.Q61L
COSM580	NRAS	c.181C>A | p.Q61K
COSM581	NRAS	c.181C>G | p.Q61E
COSM12730	NRAS	c.180_181AC>TA | p.Q61K
COSM253327	NRAS	c.176C>A | p.A59D
COSM578	NRAS	c.175G>A | p.A59T
COSM572	NRAS	c.38_39GT>TC | p.G13V
COSM568	NRAS	c.37_38GG>TA | p.G13Y
COSM573	NRAS	c.38G>A | p.G13D
COSM574	NRAS	c.38G>T | p.G13V
COSM575	NRAS	c.38G>C | p.G13A
COSM24668	NRAS	c.37_38GG>AA | p.G13N
COSM569	NRAS	c.37G>C | p.G13R
COSM570	NRAS	c.37G>T | p.G13C
COSM571	NRAS	c.37G>A | p.G13S
COSM144577	NRAS	c.35_36GT>AG | p.G12E
COSM559	NRAS	c.34_35GG>CC | p.G12P
COSM560	NRAS	c.34_35GG>TA | p.G12Y
COSM564	NRAS	c.35G>A | p.G12D
COSM565	NRAS	c.35G>C | p.G12A
COSM566	NRAS	c.35G>T | p.G12V
COSM12723	NRAS	c.34_35GG>AA | p.G12N
COSM561	NRAS	c.34G>C | p.G12R
COSM562	NRAS	c.34G>T | p.G12C
COSM563	NRAS	c.34G>A | p.G12S
COSM739	PDGFRA	c.1682T>A | p.V561D
COSM22416	PDGFRA	c.1975A>T | p.N659Y
COSM22414	PDGFRA	c.1977C>G | p.N659K
COSM22415	PDGFRA	c.1977C>A | p.N659K
COSM96895	PDGFRA	c.2523_2531delAGACATCAT | p.D842_M844delDIM
COSM12396	PDGFRA	c.2524G>T | p.D842Y
COSM12397	PDGFRA	c.2524_2526GAC>TAT | p.D842Y
COSM12398	PDGFRA	c.2524_2525GA>AT | p.D842I
COSM29007	PDGFRA	c.2524_2525GA>TT | p.D842F
COSM734174	PDGFRA	c.2524G>C | p.D842H
COSM737	PDGFRA	c.2524_2535del12 | p.I843_D846delIMHD
COSM12401	PDGFRA	c.2524_2532delGACATCATG | p.D842_M844delDIM
COSM12406	PDGFRA	c.2524_2526delGAC | p.D842delD
COSM12409	PDGFRA	c.2524_2538>AGT | p.D842_D846>S
COSM12411	PDGFRA	c.2524_2536>A | p.D842_D846>N
COSM96896	PDGFRA	c.2524_2533GACATCATGC>T | p.D842_H845>Y
COSM736	PDGFRA	c.2525A>T | p.D842V
COSM405285	PDGFRA	c.2525_2527delACA | p.D842_I843>V
COSM12412	PDGFRA	c.2525_2538>GA | p.D842_D846>G
COSM12414	PDGFRA	c.2525_2535>TT | p.D842_H845>V
COSM12408	PDGFRA	c.2526_2538>G | p.D842_D846>E
COSM12415	PDGFRA	c.2526_2541>GGCC | p.D842_S847>EA
COSM12400	PDGFRA	c.2527_2538del12 | p.I843_D846delIMHD
COSM12407	PDGFRA	c.2528_2539del12 | p.I843_S847>T
COSM744	PIK3CA	c.112C>T | p.R38C
COSM40945	PIK3CA	c.112C>G | p.R38G
COSM87310	PIK3CA	c.112C>A | p.R38S
COSM745	PIK3CA	c.113G>A | p.R38H
COSM729833	PIK3CA	c.113G>T | p.R38L
COSM30625	PIK3CA	c.115G>A | p.E39K
COSM1041451	PIK3CA	c.116A>G | p.E39G
COSM27502	PIK3CA	c.241G>A | p.E81K
COSM746	PIK3CA	c.263G>A | p.R88Q
COSM27493	PIK3CA	c.277C>T | p.R93W
COSM86041	PIK3CA	c.278G>A | p.R93Q
COSM1666660	PIK3CA	c.310C>A | p.P104T
COSM747	PIK3CA	c.311C>G | p.P104R
COSM163485	PIK3CA	c.311C>T | p.P104L
COSM748	PIK3CA	c.317G>T | p.G106V
COSM166339	PIK3CA	c.317G>C | p.G106A
COSM749	PIK3CA	c.323G>C | p.R108P
COSM27497	PIK3CA	c.323G>A | p.R108H
COSM729828	PIK3CA	c.323G>T | p.R108L
COSM24710	PIK3CA	c.325_327delGAA | p.E109del
COSM445995	PIK3CA	c.327_335delAGAAAAGAT | p.E109_I112>D
COSM13570	PIK3CA	c.331A>G | p.K111E
COSM14052	PIK3CA	c.332A>G | p.K111R
COSM12580	PIK3CA	c.333G>C | p.K111N
COSM27505	PIK3CA	c.333G>T | p.K111N
COSM253279	PIK3CA	c.1030G>A | p.V344M
COSM22540	PIK3CA	c.1031T>G | p.V344G
COSM86951	PIK3CA	c.1031T>C | p.V344A
COSM13476	PIK3CA	c.1034A>G | p.N345S
COSM94978	PIK3CA	c.1034A>T | p.N345I
COSM446001	PIK3CA	c.1034A>C | p.N345T
COSM754	PIK3CA	c.1035T>A | p.N345K
COSM86044	PIK3CA	c.1093G>A | p.E365K
COSM1484860	PIK3CA	c.1094A>T | p.E365V
COSM756	PIK3CA	c.1132T>C | p.C378R
COSM21450	PIK3CA	c.1133G>T | p.C378F
COSM1041478	PIK3CA	c.1133G>A | p.C378Y
COSM757	PIK3CA	c.1258T>C | p.C420R
COSM758	PIK3CA	c.1357G>C | p.E453Q
COSM12584	PIK3CA	c.1357G>A | p.E453K
COSM86045	PIK3CA	c.1358A>C | p.E453A
COSM3408453	PIK3CA	c.1359A>C | p.E453D
COSM21467	PIK3CA	c.1612G>A | p.D538N
COSM1716811	PIK3CA	c.1612G>T | p.D538Y
COSM29123	PIK3CA	c.1613A>G | p.D538G
COSM41779	PIK3CA	c.1615C>A | p.P539T
COSM249880	PIK3CA	c.1615C>T | p.P539S
COSM759	PIK3CA	c.1616C>G | p.P539R
COSM760	PIK3CA	c.1624G>A | p.E542K
COSM17442	PIK3CA	c.1624G>C | p.E542Q
COSM1659152	PIK3CA	c.1624_1625GA>AG | p.E542R
COSM761	PIK3CA	c.1625A>G | p.E542G
COSM762	PIK3CA	c.1625A>T | p.E542V
COSM1041494	PIK3CA	c.1625A>C | p.E542A
COSM763	PIK3CA	c.1633G>A | p.E545K
COSM27133	PIK3CA	c.1633G>C | p.E545Q
COSM764	PIK3CA	c.1634A>G | p.E545G
COSM12458	PIK3CA	c.1634A>C | p.E545A
COSM27155	PIK3CA	c.1634A>T | p.E545V
COSM765	PIK3CA	c.1635G>T | p.E545D
COSM27374	PIK3CA	c.1635G>C | p.E545D
COSM766	PIK3CA	c.1636C>A | p.Q546K
COSM6147	PIK3CA	c.1636C>G | p.Q546E
COSM767	PIK3CA	c.1637A>C | p.Q546P
COSM12459	PIK3CA	c.1637A>G | p.Q546R
COSM25041	PIK3CA	c.1637A>T | p.Q546L
COSM24712	PIK3CA	c.1638G>T | p.Q546H
COSM29315	PIK3CA	c.1639G>A | p.E547K
COSM729819	PIK3CA	c.1641G>C | p.E547D
COSM778	PIK3CA	c.2102A>C | p.H701P
COSM87306	PIK3CA	c.2176G>A | p.E726K
COSM1420887	PIK3CA	c.2177A>G | p.E726G
COSM1420889	PIK3CA	c.2177A>C | p.E726A
COSM769	PIK3CA	c.2702G>T | p.C901F
COSM6143	PIK3CA	c.3061T>A | p.Y1021N
COSM17444	PIK3CA	c.3061T>C | p.Y1021H
COSM12461	PIK3CA	c.3062A>G | p.Y1021C
COSM328025	PIK3CA	c.3062A>T | p.Y1021F
COSM771	PIK3CA	c.3073A>G | p.T1025A
COSM12590	PIK3CA	c.3073A>T | p.T1025S
COSM772	PIK3CA	c.3074C>A | p.T1025N
COSM36285	PIK3CA	c.3074C>T | p.T1025I
COSM29640	PIK3CA	c.3085G>T | p.D1029Y
COSM36286	PIK3CA	c.3085G>C | p.D1029H
COSM27148	PIK3CA	c.3087T>G | p.D1029E
COSM27375	PIK3CA	c.3103G>A | p.A1035T
COSM17445	PIK3CA	c.3104C>T | p.A1035V
COSM86043	PIK3CA	c.3118A>T | p.M1040L
COSM1484868	PIK3CA	c.3118A>G | p.M1040V
COSM163486	PIK3CA	c.3119T>C | p.M1040T
COSM25085	PIK3CA	c.3120G>A | p.M1040I
COSM12591	PIK3CA	c.3127A>G | p.M1043V
COSM12463	PIK3CA	c.3128T>C | p.M1043T
COSM773	PIK3CA	c.3129G>T | p.M1043I
COSM29313	PIK3CA	c.3129G>A | p.M1043I
COSM94984	PIK3CA	c.3129G>C | p.M1043I
COSM27134	PIK3CA	c.3130A>G | p.N1044D
COSM36288	PIK3CA	c.3130A>T | p.N1044Y
COSM22541	PIK3CA	c.3131A>G | p.N1044S
COSM12592	PIK3CA	c.3132T>A | p.N1044K
COSM27504	PIK3CA	c.3132T>G | p.N1044K
COSM25086	PIK3CA	c.3133G>A | p.D1045N
COSM729813	PIK3CA	c.3134A>T | p.D1045V
COSM27273	PIK3CA	c.3136G>A | p.A1046T
COSM6146	PIK3CA	c.3137C>T | p.A1046V
COSM27156	PIK3CA	c.3137C>A | p.A1046E
COSM774	PIK3CA	c.3139C>T | p.H1047Y
COSM775	PIK3CA	c.3140A>G | p.H1047R
COSM776	PIK3CA	c.3140A>T | p.H1047L
COSM249874	PIK3CA	c.3140A>C | p.H1047P
COSM24714	PIK3CA	c.3141T>G | p.H1047Q
COSM1041524	PIK3CA	c.3141T>A | p.H1047Q
COSM249875	PIK3CA	c.3142C>T | p.H1048Y
COSM249881	PIK3CA	c.3142C>G | p.H1048D
COSM36289	PIK3CA	c.3143A>G | p.H1048R
COSM3734761	PIK3CA	c.3143A>T | p.H1048L
COSM27157	PIK3CA	c.3144T>G | p.H1048Q
COSM777	PIK3CA	c.3145G>A | p.G1049S
COSM12597	PIK3CA	c.3145G>C | p.G1049R
COSM1168056	PIK3CA	c.3145G>T | p.G1049C
COSM27158	PIK3CA	c.3146G>C | p.G1049A
COSM308548	PIK3CA	c.3146G>A | p.G1049D
COSM714	PIK3CA	c.742C>T | p.R248C
COSM181063	RAF1	c.770C>T | p.S257L
COSM29803	RET	c.1852T>C | p.C618R
COSM980	RET	c.1853G>A | p.C618Y
COSM29804	RET	c.1858T>C | p.C620R
COSM29805	RET	c.1859G>C | p.C620S
COSM968	RET	c.1894_1899delGAGCTG | p.E632_L633del
COSM1048	RET	c.1894_1906>AGCT | p.E632_T636>SS
COSM973	RET	c.1895_1900delAGCTGT | p.E632_C634>L
COSM982	RET	c.1895_1897delAGC | p.E632_L633>V
COSM1049	RET	c.1895_1918>TGCGGC | p.E632_A640>VRP
COSM966	RET	c.1900T>C | p.C634R
COSM1237918	RET	c.1900T>A | p.C634S
COSM1738369	RET	c.1900T>G | p.C634G
COSM974	RET	c.1901G>A | p.C634Y
COSM1237919	RET	c.1901G>T | p.C634F
COSM975	RET	c.1902C>G | p.C634W
COSM1716312	RET	c.2302G>C | p.E768Q
COSM21338	RET	c.2304G>C | p.E768D
COSM981	RET	c.2646_2648AGC>TTT | p.A883F
COSM977	RET	c.2647_2648GC>TT | p.A883F
COSM133167	RET	c.2647G>T | p.A883S
COSM962	RET	c.2694_2705del12 | p.D898_E901del
COSM188545	RET	c.2735G>T | p.R912L
COSM3437793	RET	c.2735G>A | p.R912Q
COSM965	RET	c.2753T>C | p.M918T
COSM48773	SMO	c.868C>A | p.R290S
COSM1699347	SMO	c.869G>A | p.R290H
COSM216037	SMO	c.1234C>T | p.L412F
COSM34198	SMO	c.1417G>C | p.D473H
COSM13146	SMO	c.1604G>T | p.W535L
