# Supplementary material for: Genome-wide chemical mutagenesis screens allow unbiased saturation of the cancer genome and identification of drug resistance mutations
Source: Genome Res. 2017 Apr;27(4):613–25. doi: 10.1101/gr.213546.116 (PMC5378179; doi:10.1101/gr.213546.116)
Supplement: Supplemental Material [file supp_gr.213546.116_Supplemental_Table_S8.xlsx]

## Sheet: Supp _Table_S8
Base substitution classes	Tokunaga	Brammeld et al	Alvarez
	(BMC Genomics, 2014)1	(submitted paper)	(Environ Mol Mutagen, 2002)2
	Mouse	Human cancer	Drosophila
C>A	0.073	0.11	0
C>G	0.006	0.03	0
C>T	0.467	0.25	0.087
T>A	0.207	0.26	0.391
T>C	0.204	0.11	0.435
T>G	0.044	0.24	0.087
1. BMC Genomics. 2014 Nov 24;15:1016. doi: 10.1186/1471-2164-15-1016. Simulation and estimation of gene number in a biological pathway using almost complete saturation mutagenesis screening of haploid mouse cells.
Tokunaga M, Kokubu C, Maeda Y, Sese J, Horie K, Sugimoto N, Kinoshita T, Yusa K, Takeda J.
2. Environ Mol Mutagen. 2002;40(2):143-52. O-ethylthymidine adducts are the most relevant damages for mutation induced by N-ethyl-N-nitrosourea in female germ cells of Drosophila melanogaster. Alvarez L, Comendador MA, Sierra LM.
