# Supplementary material for: Genome-wide chemical mutagenesis screens allow unbiased saturation of the cancer genome and identification of drug resistance mutations
Source: Genome Res. 2017 Apr;27(4):613–25. doi: 10.1101/gr.213546.116 (PMC5378179; doi:10.1101/gr.213546.116)
Supplement: Supplemental Material [file supp_gr.213546.116_Supplemental_Table_S9.xlsx]

## Sheet: Supp_Table_S9
Pathway	Internal Id	n.genes.in.rep	total Exonic Content Block length	(E)xpected n.mut in path	(O)bserved n.mut in path	log10 (oddRatio=(O/E))	pval	% FDR	ExclusiveCoverage	Mutated Genes	prob CCK.81_ENU_Pilot_10	prob CCK.81_ENU_Pilot_12	prob CCK.81_ENU_Pilot_15	prob CCK.81_ENU_Pilot_18	prob CCK.81_ENU_Pilot_2	prob CCK.81_ENU_Pilot_26	prob CCK.81_ENU_Pilot_27	prob CCK.81_ENU_Pilot_28	prob CCK.81_ENU_Pilot_29	prob CCK.81_ENU_Pilot_3	prob CCK.81_ENU_Pilot_4	prob CCK.81_ENU_Pilot_5	prob CCK.81_ENU_Pilot_7	prob CCK.81_ENU_Pilot_9	prob NCI.H508_ENU_Flat_1	prob NCI.H508_ENU_Flat_10	prob NCI.H508_ENU_Flat_11	prob NCI.H508_ENU_Flat_13	prob NCI.H508_ENU_Flat_15	prob NCI.H508_ENU_Flat_19	prob NCI.H508_ENU_Flat_20	prob NCI.H508_ENU_Flat_21	prob NCI.H508_ENU_Flat_25	prob NCI.H508_ENU_Flat_27	prob NCI.H508_ENU_Flat_3	prob NCI.H508_ENU_Flat_5	prob NCI.H508_ENU_Flat_6	prob NCI.H508_ENU_Flat_7	prob NCI.H508_ENU_Flat_8	prob NCI.H508_ENU_Flat_9	prob NCI.H508.ENU.Cetuximab.1	prob NCI.H508.ENU.Cetuximab.10	prob NCI.H508.ENU.Cetuximab.11	prob NCI.H508.ENU.Cetuximab.12	prob NCI.H508.ENU.Cetuximab.13	prob NCI.H508.ENU.Cetuximab.14	prob NCI.H508.ENU.Cetuximab.15	prob NCI.H508.ENU.Cetuximab.16	prob NCI.H508.ENU.Cetuximab.17
Glutamate Neurotransmitter Release Cycle	518	11	60041	8.00956	19	0.375145	7.96e-05	2.45432	94.7368	STXBP1 (12.5 %) RIMS1 ( 8.3 %) SLC17A7 ( 2.8 %) UNC13B ( 2.8 %) SYT1 ( 1.4 %)	0.201111	0.148301	0.255795	0.164912	0.206599	0.143253	0.0702829	0.0848174	0.0702829	0.225132	0.175535	0.142409	0.239496	0.205035	0.0730256	0.174722	0.0866182	0.0583038	0.0480472	0.0405177	0.0675321	0.0452306	0.121899	0.0386261	0.0536555	0.092893	0.0784867	0.0802999	0.0592307	0.0946778	0.0684499	0.073938	0.0310221	0.0802999	0.0684499	0.0821096	0.0821096	0.0480472	0.0666133
Dopamine Neurotransmitter Release Cycle// Neurotransmitter Release Cycle// Norepinephrine Neurotransmitter Release Cycle// Serotonin Neurotransmitter Release Cycle	353	10	50139	6.70938	17	0.403766	8.84e-05	2.45432	94.1176	STXBP1 (12.5 %) RIMS1 ( 8.3 %) MAOA ( 2.8 %) SYT1 ( 1.4 %)	0.166115	0.121791	0.212605	0.135674	0.170753	0.117583	0.0572552	0.069197	0.0572552	0.186459	0.144581	0.116879	0.198682	0.16943	0.0595059	0.143899	0.0706791	0.0474397	0.0390545	0.0329099	0.0549991	0.0367549	0.0998296	0.0313676	0.0436374	0.0758477	0.0639912	0.0654815	0.0481983	0.0773192	0.0557517	0.0602549	0.0251738	0.0654815	0.0557517	0.0669695	0.0669695	0.0390545	0.0542458
Acetylcholine Neurotransmitter Release Cycle	40	11	51068	6.14334	16	0.415716	0.000106663	2.45432	93.75	STXBP1 (12.5 %) RIMS1 ( 8.3 %) SLC18A3 ( 1.4 %) SYT1 ( 1.4 %)	0.151014	0.110451	0.193791	0.123134	0.155271	0.10661	0.0517479	0.0625797	0.0517479	0.169703	0.131281	0.105968	0.180954	0.154057	0.0537883	0.130657	0.0639249	0.042855	0.0352651	0.0297074	0.0497031	0.0331847	0.090428	0.028313	0.0394125	0.0686181	0.0578561	0.0592081	0.043542	0.0699547	0.0503852	0.0544675	0.0227153	0.0592081	0.0503852	0.0605582	0.0605582	0.0352651	0.0490205
Amine Ligand-binding Receptors	108	40	133460	6.88985	17	0.392239	0.000126403	2.45432	82.3529	HTR4 (6.9 %) HTR2B (2.8 %) ADRA1B (1.4 %) DRD1 (1.4 %) DRD2 (1.4 %) HTR1A (1.4 %) HTR1F (1.4 %) HTR5A (1.4 %) TAAR1 (1.4 %) TAAR2 (1.4 %) TAAR5 (1.4 %) TAAR6 (1.4 %) TAAR8 (1.4 %)	0.170949	0.125434	0.218607	0.139699	0.175708	0.121109	0.0590327	0.071331	0.0590327	0.191815	0.148846	0.120386	0.204343	0.174351	0.061351	0.148146	0.072857	0.0489204	0.0402791	0.0339452	0.0567087	0.0379088	0.102855	0.0323552	0.0450022	0.0781781	0.0659704	0.0675052	0.0497021	0.0796928	0.057484	0.0621225	0.025969	0.0675052	0.057484	0.0690374	0.0690374	0.0402791	0.0559327
Inwardly Rectifying K+ Channels	644	11	57756	6.0563	15	0.393884	0.000336748	5.60445	100	KCNJ2 (6.9 %) KCNJ1 (4.2 %) KCNJ4 (4.2 %) KCNJ8 (2.8 %) ABCC8 (1.4 %) KCNJ16 (1.4 %)	0.148702	0.108719	0.1909	0.121218	0.1529	0.104935	0.0509105	0.0615728	0.0509105	0.167134	0.129248	0.104303	0.178233	0.151702	0.0529189	0.128633	0.0628971	0.0421583	0.0346896	0.0292212	0.0488979	0.0326425	0.0889947	0.0278493	0.0387706	0.0675175	0.0569228	0.0582537	0.0428344	0.0688335	0.0495692	0.0535874	0.0223422	0.0582537	0.0495692	0.0595827	0.0595827	0.0346896	0.0482261
Growth Hormone Receptor Signaling	535	24	129441	10.1274	20	0.295532	0.000750186	9.71074	75	IRS2 (18.1 %) GHR ( 4.2 %) STAT1 ( 2.8 %) STAT3 ( 2.8 %) CSH1 ( 1.4 %) GH2 ( 1.4 %) IRS1 ( 1.4 %) MAPK3 ( 1.4 %) STAT5A ( 1.4 %)	0.258504	0.192506	0.325331	0.213416	0.265282	0.186126	0.092509	0.111357	0.092509	0.288052	0.226716	0.185057	0.305577	0.263351	0.0960733	0.225701	0.113686	0.0769007	0.0634842	0.0536045	0.0889307	0.0597915	0.158993	0.0511183	0.0708263	0.121787	0.10316	0.10551	0.0781108	0.124088	0.090125	0.0972582	0.0411081	0.10551	0.090125	0.107853	0.107853	0.0634842	0.0877348
Synaptic_vesicle_trafficking	1106	19	123541	11.8822	22	0.267525	0.000983236	11.4547	95.4545	STXBP1 (12.5 %) RIMS1 ( 8.3 %) UNC13C ( 4.2 %) STX1B ( 2.8 %) UNC13B ( 2.8 %) STX2 ( 1.4 %) SYT1 ( 1.4 %) SYT2 ( 1.4 %)	0.305895	0.229748	0.381487	0.254027	0.313633	0.222311	0.111755	0.134226	0.111755	0.339512	0.269397	0.221065	0.359307	0.311431	0.116012	0.268226	0.136994	0.0930689	0.0769508	0.065049	0.107477	0.0725055	0.190543	0.0620496	0.0857777	0.146615	0.124466	0.127265	0.0945202	0.149344	0.108906	0.117427	0.0499556	0.127265	0.108906	0.130056	0.130056	0.0769508	0.106047
GABA Synthesis// Release// Reuptake And Degradation	485	19	103978	10.7877	20	0.268101	0.00179765	19.0387	85	STXBP1 (12.5 %) RIMS1 ( 8.3 %) SLC32A1 ( 2.8 %) ALDH5A1 ( 1.4 %) GAD2 ( 1.4 %) SLC6A1 ( 1.4 %) SLC6A11 ( 1.4 %) SLC6A13 ( 1.4 %) SYT1 ( 1.4 %)	0.276379	0.206471	0.34665	0.228672	0.28353	0.199687	0.0996679	0.119876	0.0996679	0.307516	0.242768	0.198551	0.325934	0.281494	0.103492	0.241693	0.12237	0.0829077	0.0684825	0.0578491	0.0958276	0.0645091	0.17079	0.0551719	0.0763787	0.131043	0.111091	0.11361	0.0842079	0.133505	0.0971095	0.104763	0.0443865	0.11361	0.0971095	0.116122	0.116122	0.0684825	0.0945438
[truncated: 33 more columns]
