# Supplementary material for: Genome-wide chemical mutagenesis screens allow unbiased saturation of the cancer genome and identification of drug resistance mutations
Source: HighWire-hosted journal article supplement (doi:10.1101/gr.213546.116), 2017-02-08
Supplement: Supplemental_Fig_S1.pdf [file Supplemental_Fig_S1.pdf]

# Supplemental Figure S1

A

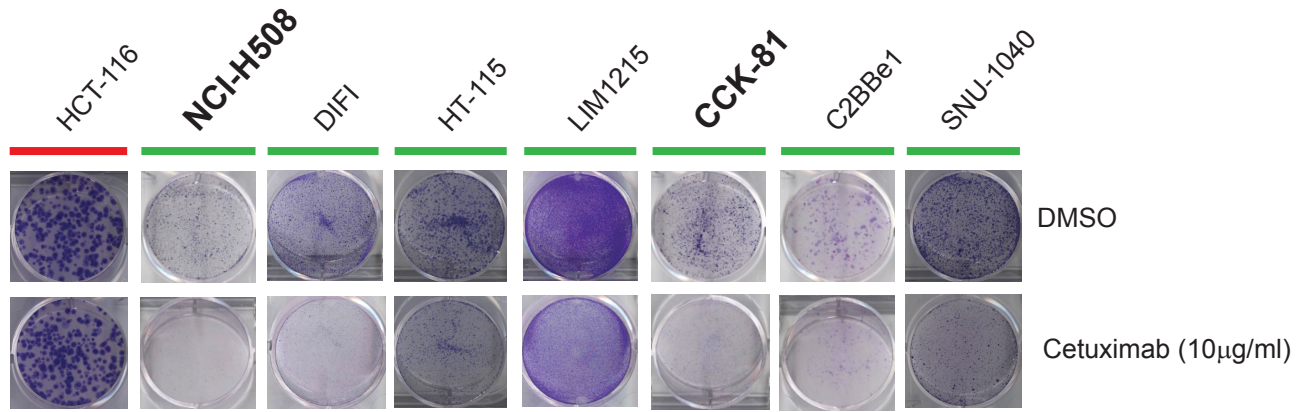

B

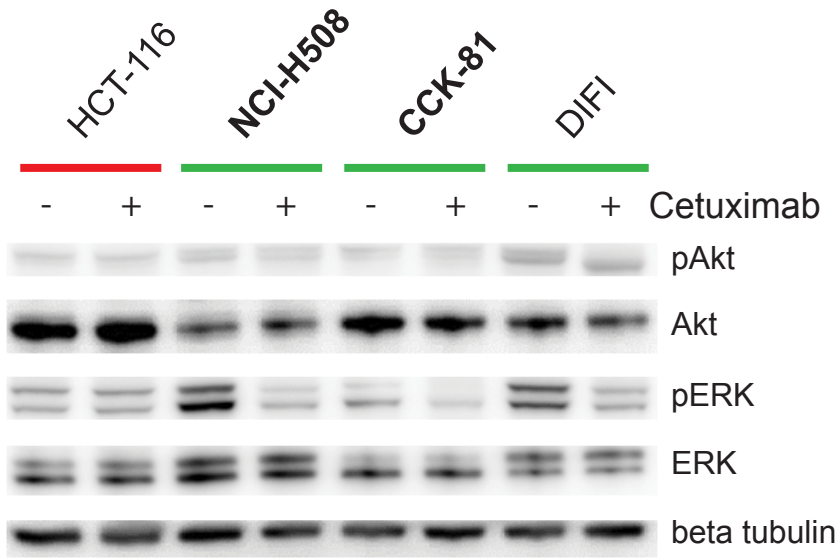

**Supp Figure S1.** (A) Clonogenic survival assays of 8 KRAS/NRAS/BRAF wild-type colorectal cell lines together with a KRAS G13D mutant line (HCT116) treated with 10 µg/ml Cetuximab and assayed at 21 days. Plates were stained with Giemsa. (B) Effect of Cetuximab treatment at 6 hours on MAPK and PI3K signalling in Cetuximab sensitive (green bar) versus resistant (red bar) colorectal cell lines. Beta tubulin is used as a loading control.
