# Supplementary material for: Genome-wide chemical mutagenesis screens allow unbiased saturation of the cancer genome and identification of drug resistance mutations
Source: HighWire-hosted journal article supplement (doi:10.1101/gr.213546.116), 2017-02-08

## NCI-H508 MSS clones

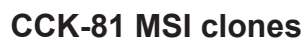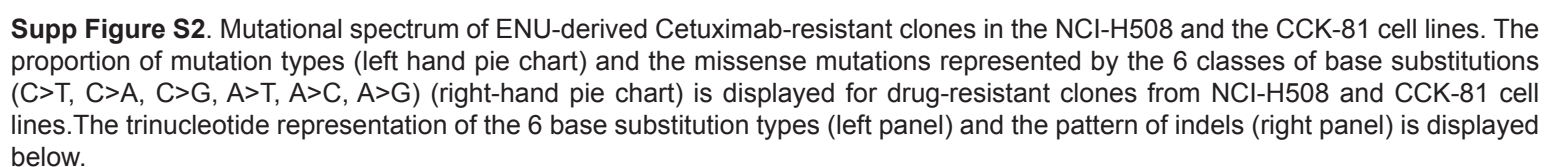

Supplement: Supplemental_Fig_S2.pdf [file Supplemental_Fig_S2.pdf]
