# Supplementary material for: Genome-wide chemical mutagenesis screens allow unbiased saturation of the cancer genome and identification of drug resistance mutations
Source: HighWire-hosted journal article supplement (doi:10.1101/gr.213546.116), 2017-02-08
Supplement: Supplemental_Fig_S3.pdf [file Supplemental_Fig_S3.pdf]

Supplemental Figure S3

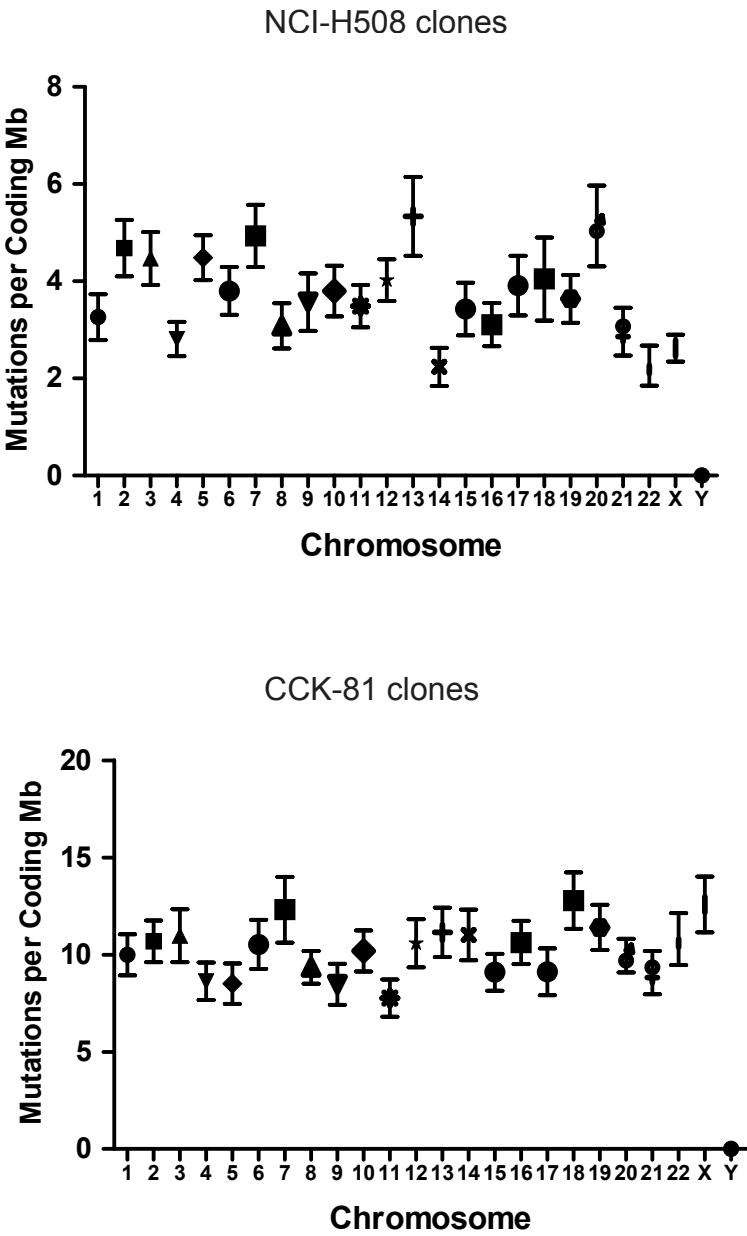

**Supp Figure S3.** Distribution of coding mutations per chromosome. All mutations detected in the NCI-H508 and CCK-81 cetuximab-resistant clones were combined and the mean number of mutations calculated per Mb of coding exon per chromosome.
