# Supplementary material for: Genome-wide chemical mutagenesis screens allow unbiased saturation of the cancer genome and identification of drug resistance mutations
Source: HighWire-hosted journal article supplement (doi:10.1101/gr.213546.116), 2017-02-08
Supplement: Supplemental_Fig_S5.pdf [file Supplemental_Fig_S5.pdf]

Supplemental Figure S5

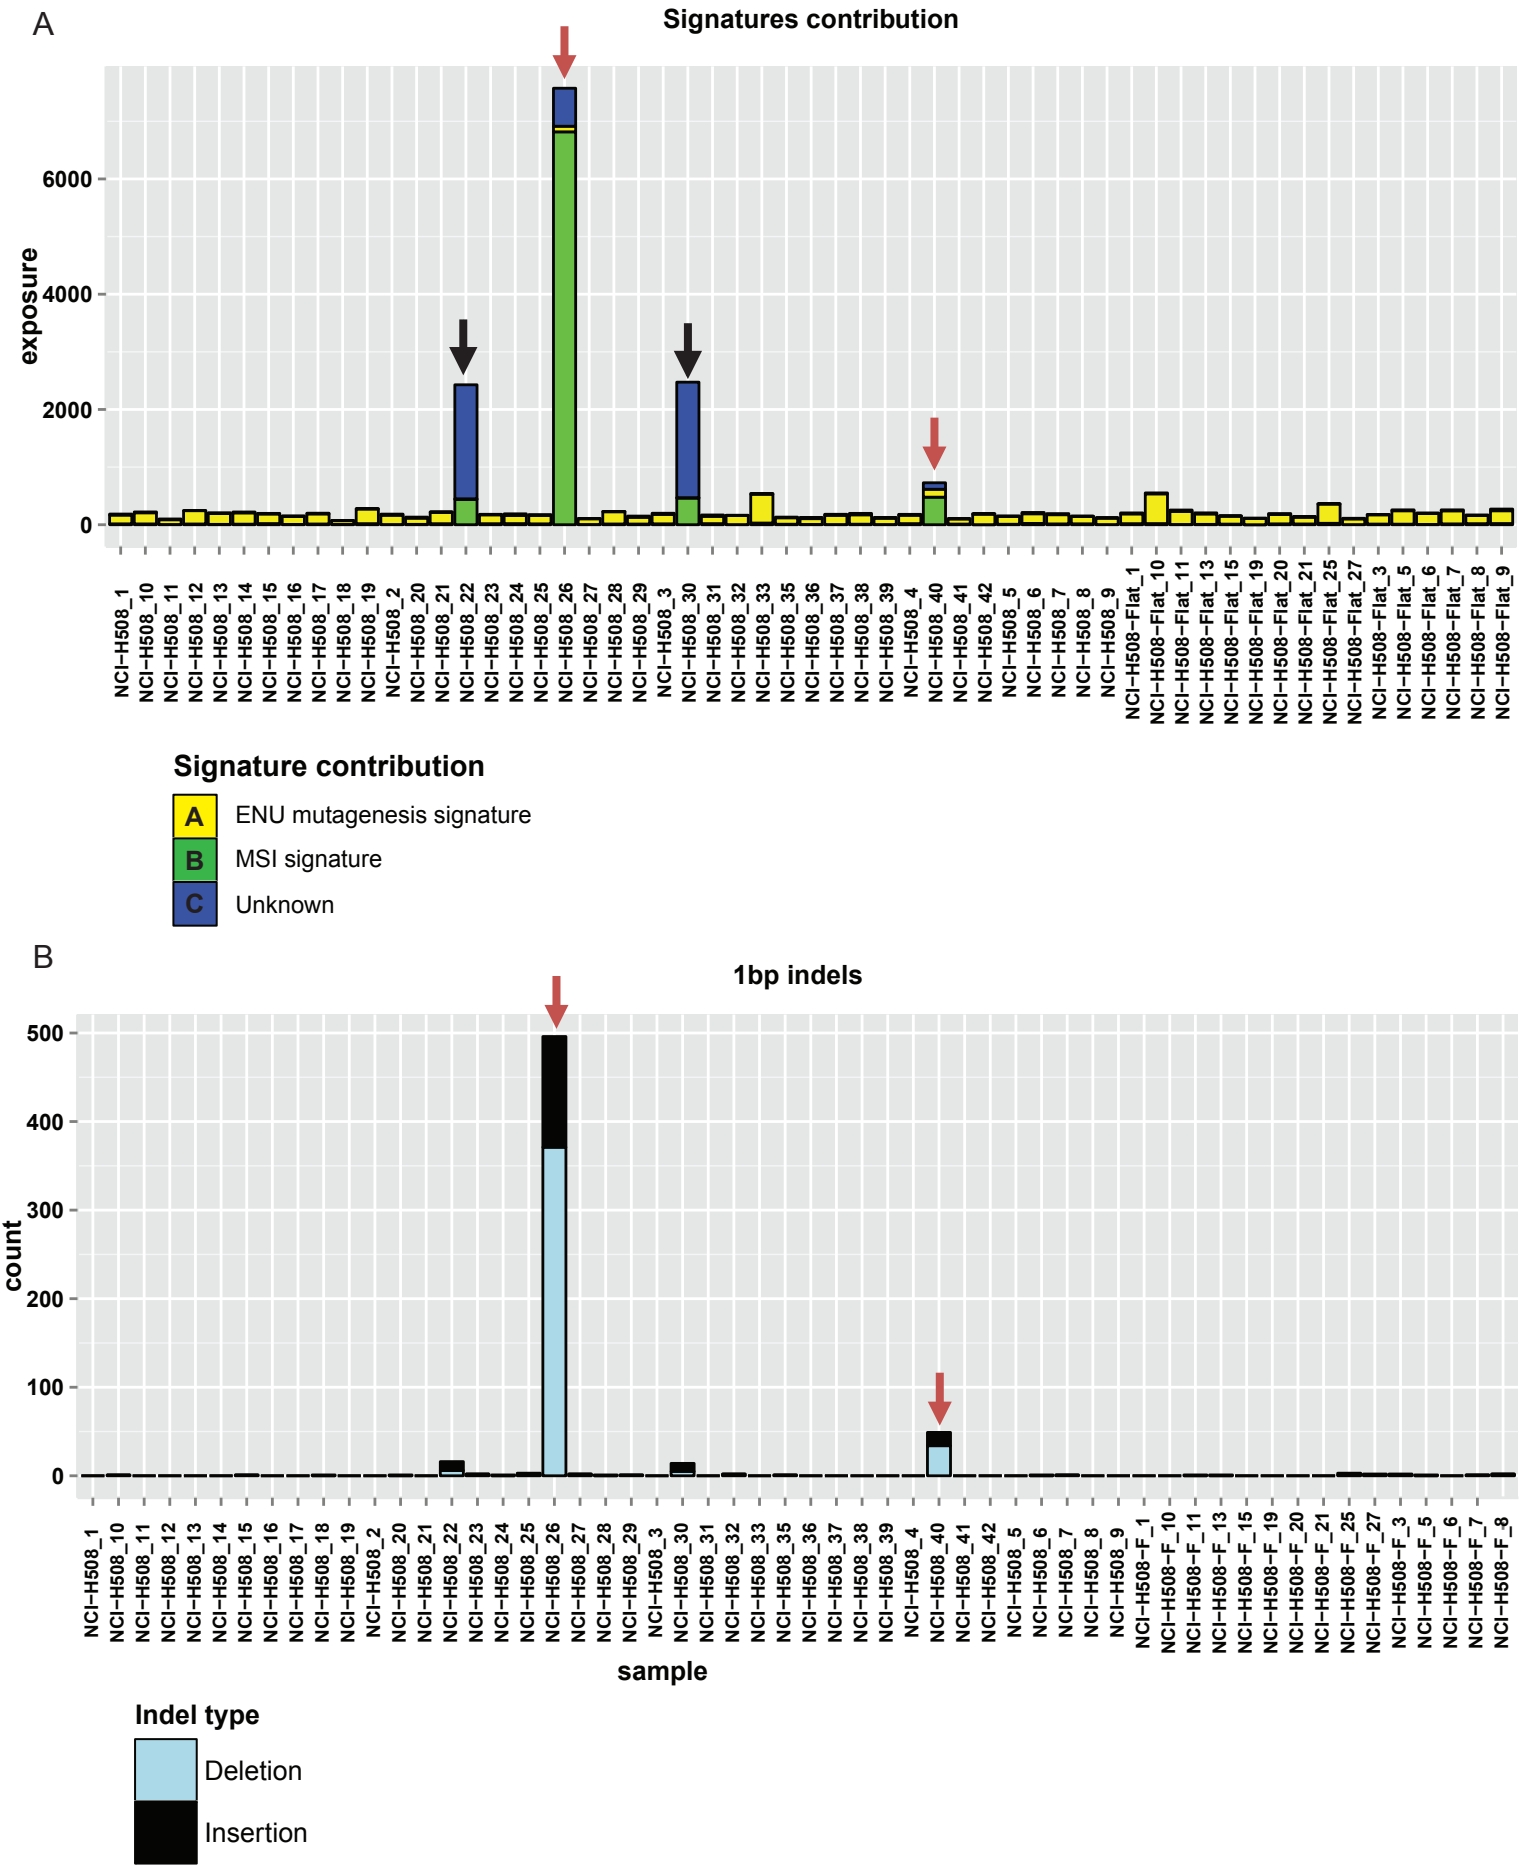

**Supp Figure S5.** The contribution from each of the NCI-H508-derived Cetuximab resistant clones towards generating Signatures A, B and C. (A) Total number of mutations with contributions from corresponding mutational signatures. (B) Total number of 1bp insertions and deletions with respective contributions.
