# Supplementary material for: Genome-wide chemical mutagenesis screens allow unbiased saturation of the cancer genome and identification of drug resistance mutations
Source: HighWire-hosted journal article supplement (doi:10.1101/gr.213546.116), 2017-02-08
Supplement: Supplemental_Fig_S8.pdf [file Supplemental_Fig_S8.pdf]

A

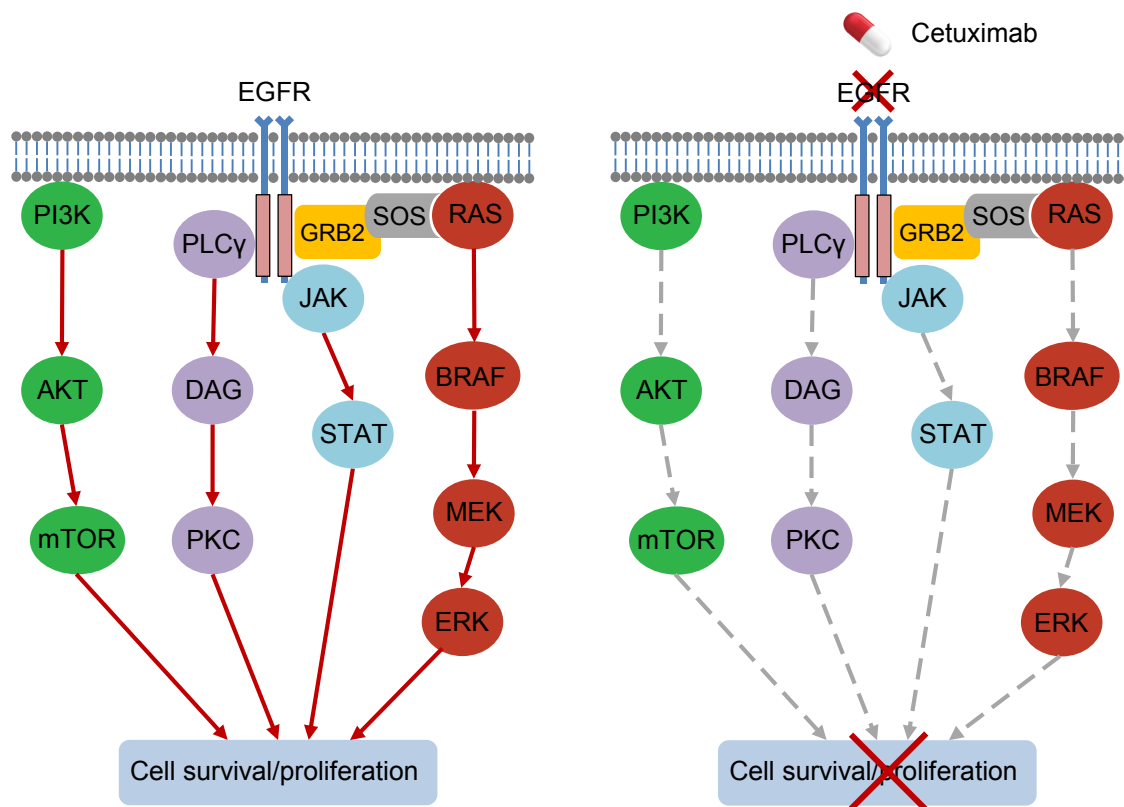

B

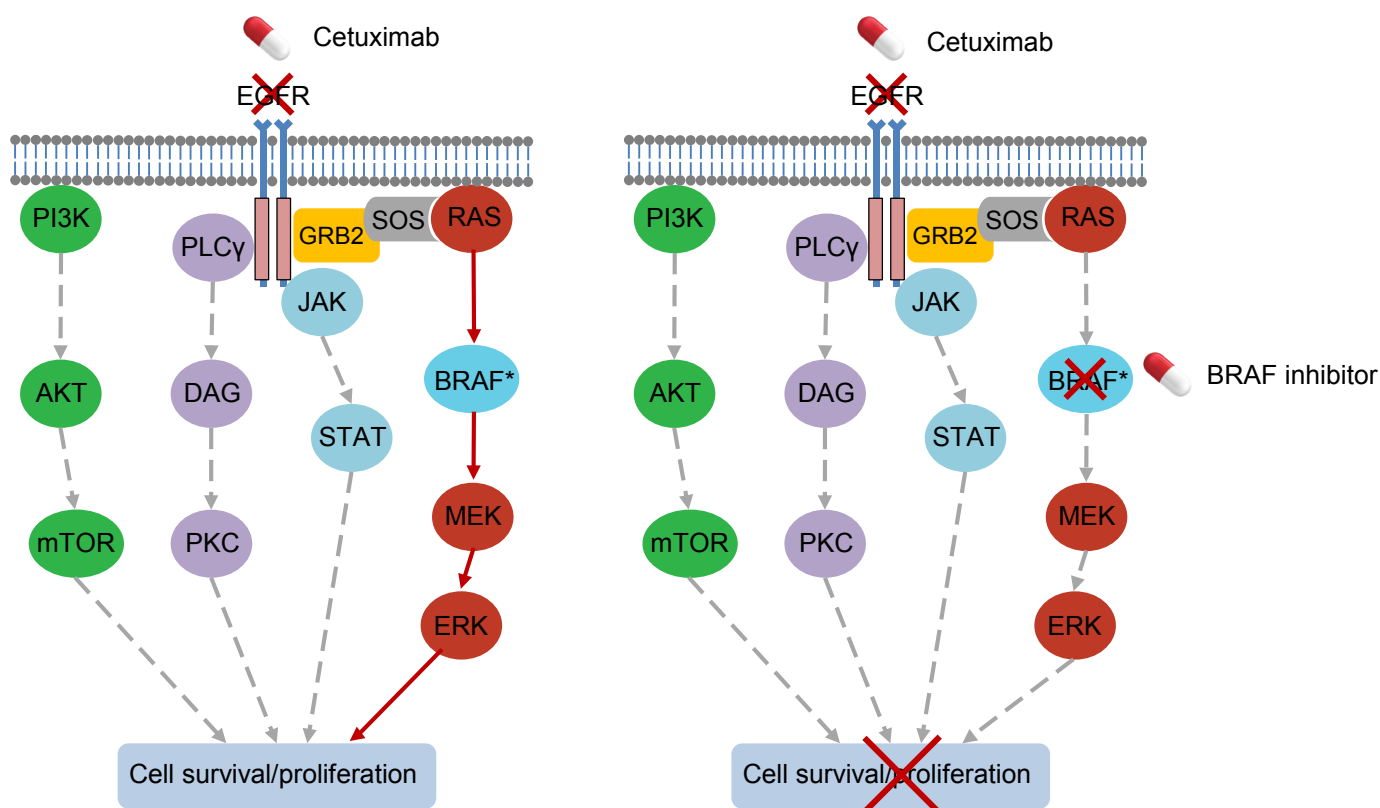

**Supp Figure S8.** (A) In the parental cells, blockade of EGFR signaling inhibits a variety of downstream signaling pathways, including PI3K, JAK-STAT, PLC-PKC and MAPK. (B) In a Cetuximab-resistant clone that has acquired an activating mutation in BRAF (asterisk), treatment of the cells with Cetuximab fails to suppress MAPK signaling and cells continue to proliferate. Only when a BRAF inhibitor is combined with Cetuximab are all the relevant signaling pathways inhibited and cell survival/proliferation reduced.
