# Supplementary material for: Genome-wide chemical mutagenesis screens allow unbiased saturation of the cancer genome and identification of drug resistance mutations
Source: HighWire-hosted journal article supplement (doi:10.1101/gr.213546.116), 2017-02-08
Supplement: Supplemental_Fig_S10.pdf [file Supplemental_Fig_S10.pdf]

Supplemental Figure S10

A

Mutation Spectrum of Gamma radiation-derived HCT116 Clones (MSI)

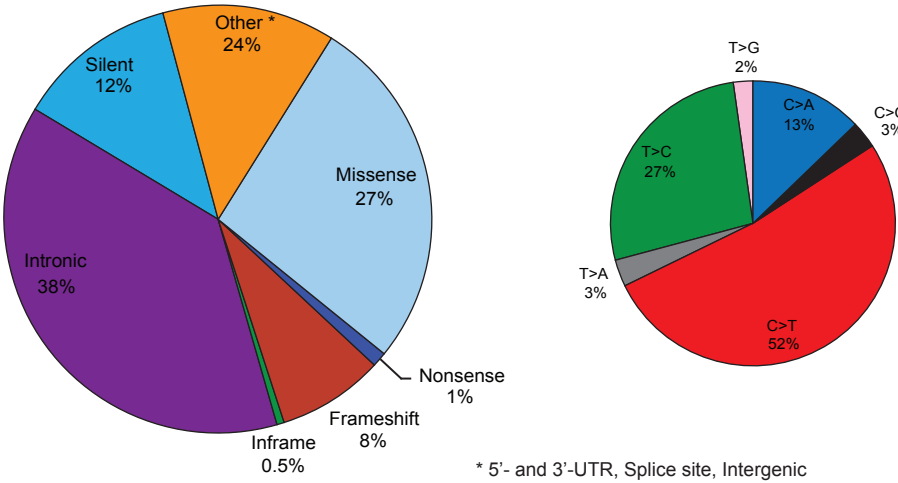

B

Mutation Spectrum of Gamma radiation-derived NCI-H3122 Clones (MSS)

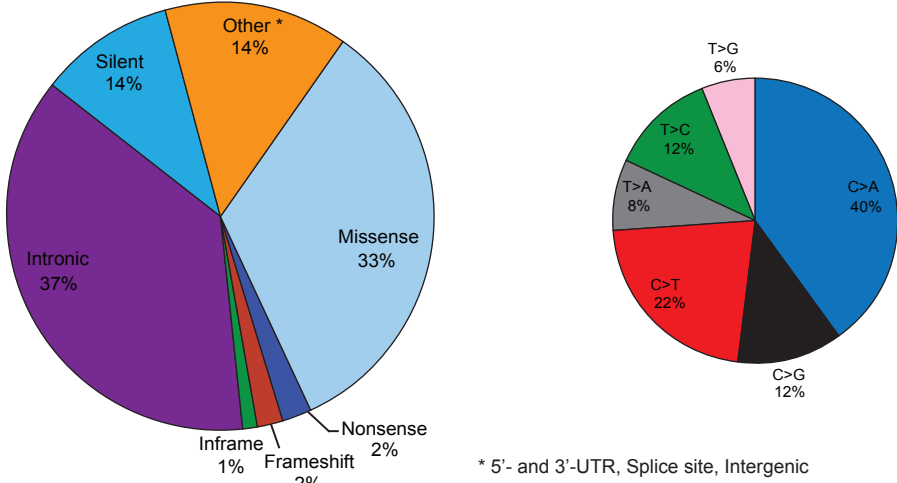

**Supp Figure S10.** Mutation spectrum and types of mutations observed following whole exome sequencing of 9 single cell-derived clones from the (A) MSI HCT116 cell line and the (B) MSS NCI-H3122 cell line. Each cell line was gamma irradiated with 1Gy or 10Gy and the following day seeded as single cells in order to generated single cell-derived colonies.
