# Supplementary material for: Genome-wide chemical mutagenesis screens allow unbiased saturation of the cancer genome and identification of drug resistance mutations
Source: HighWire-hosted journal article supplement (doi:10.1101/gr.213546.116), 2017-02-08
Supplement: Supplemental_Fig_S11.pdf [file Supplemental_Fig_S11.pdf]

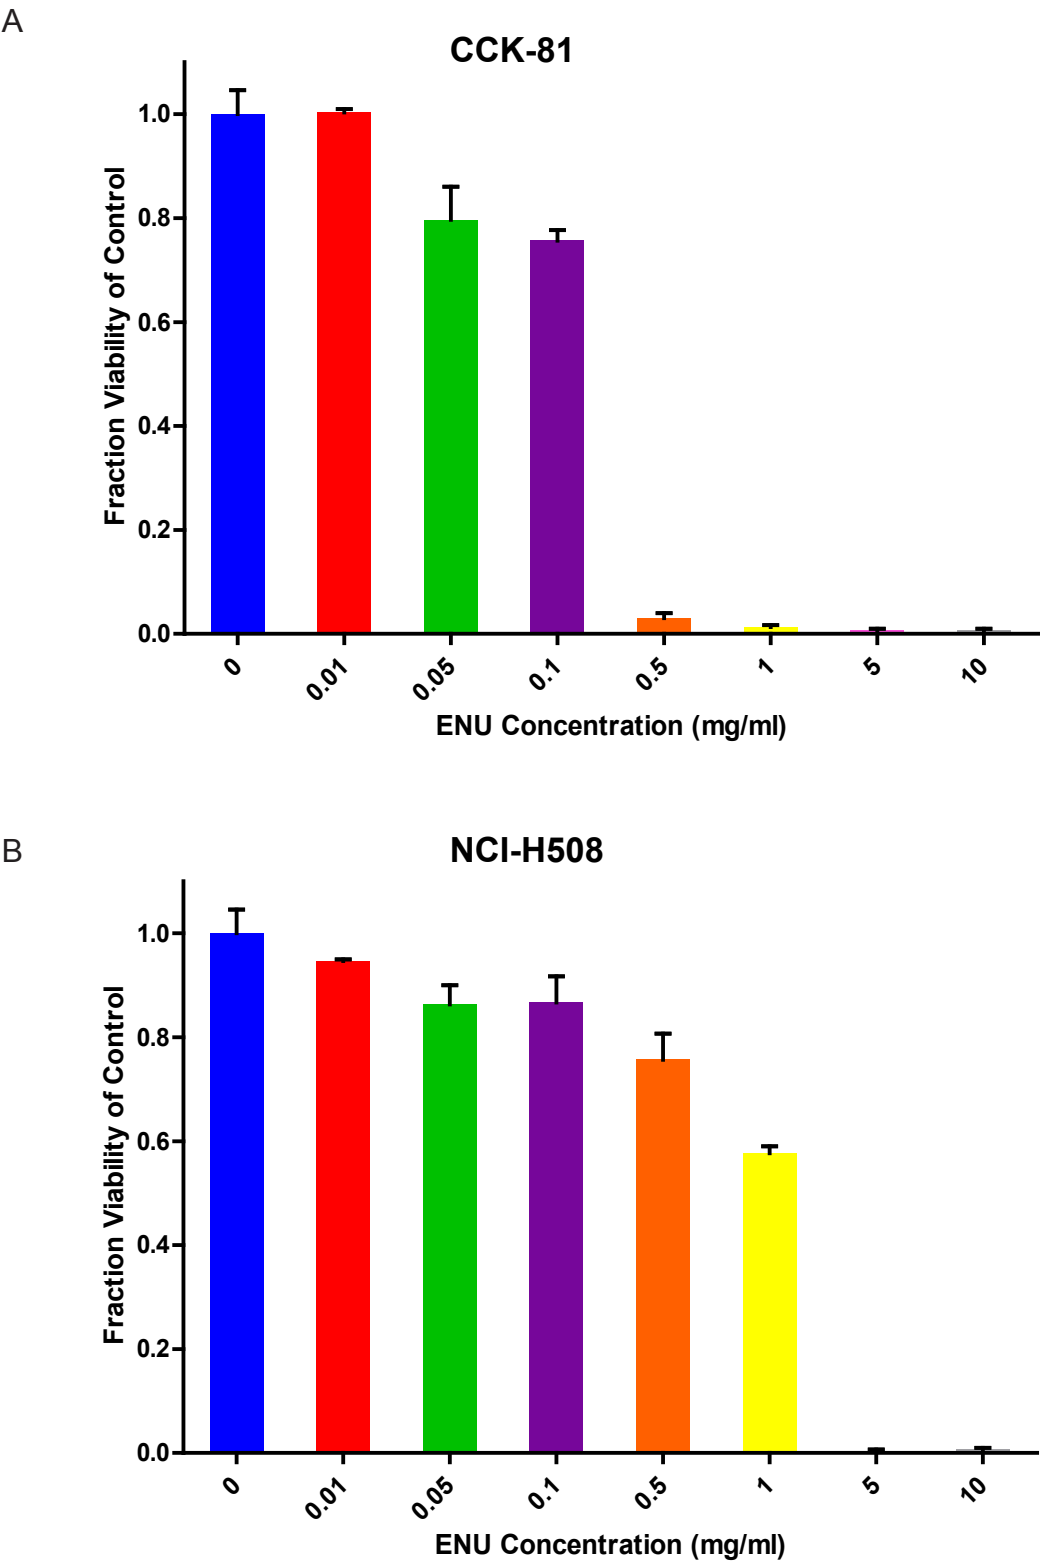

**Supp Figure S11.** Cetuximab sensitive colorectal cancer cell lines show variable sensitivity to ENU. (A) CCK-81 and (B) NCI-H508 cell viability after incubation with ENU for 24 hours. Cells were assayed using cell titre blue after a 24 hour recovery period without ENU. Experiments were performed in triplicate. Error bars represent the standard deviation of triplicate values.
